# Supplementary material for: Comparing the catch composition, profitability and discard survival from different trammel net designs targeting common spiny lobster (Palinurus elephas) in a Mediterranean fishery
Source: PeerJ. 2018 May 17;6:e4707. doi: 10.7717/peerj.4707 (PMC5960583; doi:10.7717/peerj.4707)
Supplement: Supplemental Information 3 [file peerj-06-4707-s003.xlsx]

## Sheet: Query1
Metiere	IDTramelnet	MeshType	IDNettingWall	IDFish	SP	Length	LengthTens	Discarded	Survived
LOBSTER	1	PMF	2	1	Palinurus elephas		15	FALSE	FALSE
LOBSTER	1	PMF	2	2	Raja sp.	47		TRUE	FALSE
LOBSTER	1	PMF	2	3	Raja sp.			TRUE	FALSE
LOBSTER	1	PMF	4	4	Raja sp.			TRUE	FALSE
LOBSTER	1	PMF	5	5	Palinurus elephas		15	FALSE	FALSE
LOBSTER	1	PMF	5	3485	Raja clavata	46		TRUE	TRUE
LOBSTER	1	PMF	7	7	Raja sp.			TRUE	FALSE
LOBSTER	1	PMF	7	8	Raja sp.			TRUE	FALSE
LOBSTER	1	PMF	7	9	Trigla lyra	31		TRUE	FALSE
LOBSTER	1	PMF	8	10	Palinurus elephas		15	FALSE	FALSE
LOBSTER	1	PMF	8	11	Palinurus elephas		15	FALSE	FALSE
LOBSTER	1	PMF	8	12	Palinurus elephas		15	FALSE	FALSE
LOBSTER	1	PMF	9	13	Palinurus elephas		15	FALSE	FALSE
LOBSTER	1	PMF	9	14	Leucoraja naevus		30	TRUE	TRUE
LOBSTER	1	PMF	10	15	Scorpaena scrofa		30	FALSE	FALSE
LOBSTER	1	PMF	10	16	Trigla lyra	38		TRUE	FALSE
LOBSTER	1	PMF	10	17	Scorpaena scrofa	40		TRUE	TRUE
LOBSTER	1	PMF	11	18	Raja sp.			TRUE	FALSE
LOBSTER	1	PMF	11	19	Raja sp.			TRUE	FALSE
LOBSTER	1	PMF	13	20	Raja sp.			TRUE	FALSE
LOBSTER	1	PMF	14	21	Raja sp.			TRUE	FALSE
LOBSTER	1	PMF	15	22	Raja sp.			TRUE	FALSE
LOBSTER	1	PMF	15	23	Raja sp.			TRUE	FALSE
LOBSTER	1	PMF	17	24	Leucoraja naevus		40	TRUE	TRUE
LOBSTER	1	PMF	17	25	Raja sp.			TRUE	FALSE
LOBSTER	1	PMF	18	26	Leucoraja naevus		40	TRUE	TRUE
LOBSTER	1	PMF	19	27	Raja sp.			TRUE	FALSE
LOBSTER	1	PMF	19	28	Raja sp.			TRUE	FALSE
LOBSTER	1	PMF	19	3486	Dardanus arrosor		5	TRUE	TRUE
LOBSTER	1	PMF	20	29	Raja sp.			TRUE	FALSE
LOBSTER	1	PMF	24	30	Raja clavata		30	TRUE	TRUE
LOBSTER	1	PMF	25	31	Raja clavata			FALSE	FALSE
LOBSTER	1	PMF	25	32	Stichopus regalis		20	TRUE	TRUE
LOBSTER	1	PMF	25	33	Raja sp.			TRUE	FALSE
LOBSTER	1	PMF	26	34	Raja clavata			FALSE	FALSE
LOBSTER	1	PMF	26	35	Leucoraja naevus		30	TRUE	FALSE
LOBSTER	1	PMF	26	36	Raja sp.			TRUE	FALSE
LOBSTER	2	PMF	30	37	Scyliorhinus canicula	41		TRUE	FALSE
LOBSTER	2	PMF	30	38	Scyliorhinus canicula	38		TRUE	FALSE
LOBSTER	2	PMF	31	39	Trigla lyra			FALSE	FALSE
LOBSTER	2	PMF	31	40	Trigla lyra			FALSE	FALSE
LOBSTER	2	PMF	31	41	Scyliorhinus canicula	42		TRUE	FALSE
LOBSTER	2	PMF	31	42	Peristedion cataphractum	26		TRUE	FALSE
LOBSTER	2	PMF	32	43	Palinurus elephas		15	FALSE	FALSE
LOBSTER	2	PMF	32	44	Scorpaena scrofa	31		TRUE	FALSE
LOBSTER	2	PMF	34	45	Scyliorhinus canicula	40		TRUE	FALSE
LOBSTER	2	PMF	35	46	Palinurus elephas		15	FALSE	FALSE
LOBSTER	2	PMF	35	47	Lophius piscatorius		40	FALSE	FALSE
LOBSTER	2	PMF	37	48	Calappa granulata		10	FALSE	FALSE
LOBSTER	2	PMF	39	49	Trigla lyra			FALSE	FALSE
LOBSTER	2	PMF	39	50	Raja sp.			TRUE	FALSE
LOBSTER	2	PMF	40	51	Stichopus regalis		20	TRUE	TRUE
LOBSTER	2	PMF	40	52	Trigla lyra			TRUE	FALSE
LOBSTER	2	PMF	40	3487	Dardanus arrosor		20	TRUE	TRUE
LOBSTER	2	PMF	41	53	Scorpaena scrofa	33		TRUE	FALSE
LOBSTER	2	PMF	42	54	Raja sp.			TRUE	FALSE
LOBSTER	2	PMF	44	55	Raja sp.			TRUE	FALSE
LOBSTER	2	PMF	45	56	Scorpaena scrofa		40	FALSE	FALSE
LOBSTER	2	PMF	46	57	Trigla lyra			TRUE	FALSE
LOBSTER	2	PMF	48	58	Raja sp.			TRUE	FALSE
LOBSTER	2	PMF	48	59	Raja sp.		50	TRUE	FALSE
LOBSTER	2	PMF	49	60	Raja sp.			TRUE	FALSE
LOBSTER	2	PMF	49	61	Raja sp.			TRUE	FALSE
LOBSTER	2	PMF	49	62	Raja sp.			TRUE	FALSE
LOBSTER	2	PMF	49	3488	Dardanus arrosor		20	TRUE	TRUE
LOBSTER	2	PMF	50	63	Lophius piscatorius			FALSE	FALSE
LOBSTER	2	PMF	50	64	Raja sp.			TRUE	FALSE
LOBSTER	2	PMF	50	65	Peristedion cataphractum	29		TRUE	FALSE
LOBSTER	2	PMF	52	66	Leucoraja naevus		40	TRUE	TRUE
LOBSTER	2	PMF	52	67	Leucoraja naevus		40	TRUE	TRUE
LOBSTER	2	PMF	52	68	Raja sp.			TRUE	FALSE
LOBSTER	2	PMF	53	69	Raja sp.		30	TRUE	TRUE
LOBSTER	2	PMF	54	70	Leucoraja naevus		40	TRUE	TRUE
LOBSTER	2	PMF	54	71	Leucoraja naevus			TRUE	FALSE
LOBSTER	2	PMF	54	72	Leucoraja naevus		40	TRUE	TRUE
LOBSTER	2	PMF	54	73	Palinurus elephas		5	TRUE	TRUE
LOBSTER	2	PMF	54	3489	Leucoraja naevus		40	TRUE	TRUE
LOBSTER	2	PMF	54	3490	Leucoraja naevus		30	TRUE	TRUE
LOBSTER	2	PMF	55	74	Scorpaena scrofa		30	FALSE	FALSE
LOBSTER	2	PMF	55	75	Palinurus elephas		15	FALSE	FALSE
LOBSTER	2	PMF	55	76	Raja sp.			TRUE	FALSE
LOBSTER	3	PMF	57	77	Raja sp.	52		TRUE	FALSE
LOBSTER	3	PMF	59	78	Leucoraja naevus		40	TRUE	TRUE
LOBSTER	3	PMF	59	79	Leucoraja naevus			TRUE	FALSE
LOBSTER	3	PMF	59	80	Leucoraja naevus	50.5		TRUE	TRUE
LOBSTER	3	PMF	59	680	Zeus faber	39.5		TRUE	FALSE
LOBSTER	3	PMF	60	681	Scorpaena scrofa			FALSE	FALSE
LOBSTER	3	PMF	60	682	Raja clavata			FALSE	FALSE
LOBSTER	3	PMF	60	683	Raja sp.			TRUE	FALSE
LOBSTER	3	PMF	60	684	Leucoraja naevus	49		TRUE	TRUE
LOBSTER	3	PMF	61	685	Leucoraja naevus			TRUE	FALSE
LOBSTER	3	PMF	61	686	Raja clavata			FALSE	FALSE
LOBSTER	3	PMF	61	687	Raja clavata	48		TRUE	FALSE
LOBSTER	3	PMF	62	688	Leucoraja naevus		30	TRUE	TRUE
LOBSTER	3	PMF	62	689	Zeus faber	43		TRUE	FALSE
LOBSTER	3	PMF	63	690	Lophius piscatorius			FALSE	FALSE
LOBSTER	3	PMF	64	691	Raja clavata	49		TRUE	FALSE
LOBSTER	3	PMF	65	692	Palinurus elephas		15	FALSE	FALSE
LOBSTER	3	PMF	66	228	Leucoraja naevus		40	TRUE	TRUE
LOBSTER	3	PMF	66	229	Leucoraja naevus			TRUE	FALSE
LOBSTER	3	PMF	66	230	Leucoraja naevus		40	TRUE	TRUE
LOBSTER	3	PMF	66	231	Leucoraja naevus			TRUE	FALSE
LOBSTER	3	PMF	66	232	Torpedo marmorata	34		TRUE	TRUE
LOBSTER	3	PMF	66	233	Raja clavata	63		TRUE	FALSE
LOBSTER	3	PMF	66	693	Leucoraja naevus			TRUE	FALSE
LOBSTER	3	PMF	68	234	Raja clavata			TRUE	FALSE
LOBSTER	3	PMF	69	235	Merluccius merluccius			FALSE	FALSE
LOBSTER	3	PMF	69	236	Raja sp.			TRUE	FALSE
LOBSTER	3	PMF	73	237	Lophius piscatorius			FALSE	FALSE
LOBSTER	3	PMF	75	238	Palinurus elephas		15	FALSE	FALSE
LOBSTER	3	PMF	78	239	Leucoraja naevus		40	TRUE	TRUE
LOBSTER	3	PMF	78	240	Raja clavata		30	TRUE	TRUE
LOBSTER	3	PMF	78	241	Raja sp.			TRUE	FALSE
LOBSTER	3	PMF	83	242	Scorpaena scrofa		30	FALSE	FALSE
LOBSTER	4	PMF	87	243	Palinurus elephas		25	FALSE	FALSE
LOBSTER	4	PMF	87	244	Palinurus elephas		15	FALSE	FALSE
LOBSTER	4	PMF	87	245	Palinurus elephas		5	TRUE	TRUE
LOBSTER	4	PMF	87	246	Scyliorhinus canicula	37		TRUE	FALSE
LOBSTER	4	PMF	87	247	Palinurus elephas		15	FALSE	FALSE
LOBSTER	4	PMF	90	248	Raja sp.	52		TRUE	FALSE
LOBSTER	4	PMF	91	249	Palinurus elephas		15	FALSE	FALSE
LOBSTER	4	PMF	95	250	Lophius piscatorius		40	FALSE	FALSE
LOBSTER	4	PMF	95	251	Palinurus elephas		15	FALSE	FALSE
LOBSTER	4	PMF	95	252	Scorpaena scrofa		30	FALSE	FALSE
LOBSTER	4	PMF	98	253	Palinurus elephas		15	FALSE	FALSE
LOBSTER	4	PMF	98	254	Palinurus elephas		15	FALSE	FALSE
LOBSTER	4	PMF	98	255	Scorpaena scrofa	32		TRUE	FALSE
LOBSTER	4	PMF	99	256	Scorpaena scrofa		30	FALSE	FALSE
LOBSTER	4	PMF	99	257	Scorpaena scrofa		40	FALSE	FALSE
LOBSTER	4	PMF	99	258	Scorpaena scrofa	43.5		TRUE	FALSE
LOBSTER	4	PMF	99	259	Scorpaena scrofa	42		TRUE	FALSE
LOBSTER	4	PMF	100	260	Palinurus elephas		15	FALSE	FALSE
LOBSTER	4	PMF	102	261	Raja sp.	75		TRUE	FALSE
LOBSTER	4	PMF	105	262	Scorpaena scrofa			TRUE	FALSE
LOBSTER	4	PMF	106	263	Palinurus elephas		15	FALSE	FALSE
LOBSTER	4	PMF	106	264	Palinurus elephas		15	FALSE	FALSE
LOBSTER	4	PMF	107	265	Myliobatis aquila	72		TRUE	FALSE
LOBSTER	5	PMF	110	266	Palinurus elephas			TRUE	FALSE
LOBSTER	5	PMF	110	267	Raja clavata			TRUE	FALSE
LOBSTER	5	PMF	110	268	Leucoraja naevus		30	TRUE	FALSE
LOBSTER	5	PMF	111	269	Raja sp.			TRUE	FALSE
LOBSTER	5	PMF	112	270	Palinurus elephas		15	FALSE	FALSE
LOBSTER	5	PMF	112	271	Leucoraja naevus		40	TRUE	TRUE
LOBSTER	5	PMF	112	272	Leucoraja naevus			TRUE	FALSE
LOBSTER	5	PMF	113	273	Peristedion cataphractum			FALSE	FALSE
LOBSTER	5	PMF	113	274	Trigla lyra			FALSE	FALSE
LOBSTER	5	PMF	113	275	Leucoraja naevus		40	TRUE	TRUE
LOBSTER	5	PMF	113	276	Leucoraja naevus		40	TRUE	TRUE
LOBSTER	5	PMF	113	277	Raja sp.			TRUE	FALSE
LOBSTER	5	PMF	113	278	Raja sp.			TRUE	FALSE
LOBSTER	5	PMF	113	279	Raja sp.			TRUE	FALSE
LOBSTER	5	PMF	113	280	Raja sp.			TRUE	FALSE
LOBSTER	5	PMF	113	281	Raja sp.			TRUE	FALSE
LOBSTER	5	PMF	113	282	Raja sp.			TRUE	FALSE
LOBSTER	5	PMF	113	283	Raja clavata		30	TRUE	TRUE
LOBSTER	5	PMF	113	284	Raja clavata		30	TRUE	TRUE
LOBSTER	5	PMF	113	285	Raja clavata		30	TRUE	TRUE
LOBSTER	5	PMF	114	286	Raja sp.			TRUE	FALSE
LOBSTER	5	PMF	114	287	Raja sp.			TRUE	FALSE
LOBSTER	5	PMF	115	288	Leucoraja naevus		40	TRUE	TRUE
LOBSTER	5	PMF	115	289	Trigla lyra			FALSE	FALSE
LOBSTER	5	PMF	115	290	Raja clavata			FALSE	FALSE
LOBSTER	5	PMF	115	291	Raja sp.			TRUE	FALSE
LOBSTER	5	PMF	116	292	Raja clavata			FALSE	FALSE
LOBSTER	5	PMF	116	293	Trigla lyra			FALSE	FALSE
LOBSTER	5	PMF	116	294	Raja clavata	42.5		TRUE	FALSE
LOBSTER	5	PMF	116	295	Raja sp.			TRUE	FALSE
LOBSTER	5	PMF	116	296	Raja sp.			TRUE	FALSE
LOBSTER	5	PMF	117	297	Leucoraja naevus			FALSE	FALSE
LOBSTER	5	PMF	117	298	Raja sp.			TRUE	FALSE
LOBSTER	5	PMF	117	299	Raja clavata		30	TRUE	TRUE
LOBSTER	5	PMF	117	300	Peristedion cataphractum			TRUE	FALSE
LOBSTER	5	PMF	117	694	Leucoraja naevus		40	TRUE	TRUE
LOBSTER	5	PMF	117	695	Leucoraja naevus		30	TRUE	TRUE
LOBSTER	5	PMF	118	696	Raja clavata			FALSE	FALSE
LOBSTER	5	PMF	118	697	Raja sp.			TRUE	FALSE
LOBSTER	5	PMF	118	698	Raja sp.			TRUE	FALSE
LOBSTER	5	PMF	118	699	Raja sp.			TRUE	FALSE
LOBSTER	5	PMF	118	700	Raja sp.			TRUE	FALSE
LOBSTER	5	PMF	119	701	Raja sp.			TRUE	FALSE
LOBSTER	5	PMF	119	702	Raja sp.			TRUE	FALSE
LOBSTER	5	PMF	120	703	Leucoraja naevus		30	TRUE	TRUE
LOBSTER	5	PMF	120	704	Leucoraja naevus			TRUE	FALSE
LOBSTER	5	PMF	121	705	Trigla lyra			FALSE	FALSE
LOBSTER	5	PMF	121	706	Raja sp.			TRUE	FALSE
LOBSTER	5	PMF	121	707	Raja clavata		30	TRUE	TRUE
LOBSTER	5	PMF	121	708	Raja sp.			TRUE	FALSE
LOBSTER	5	PMF	121	709	Raja sp.			TRUE	FALSE
LOBSTER	5	PMF	121	710	Raja sp.			TRUE	FALSE
LOBSTER	5	PMF	121	711	Raja clavata		30	TRUE	TRUE
LOBSTER	5	PMF	121	712	Leucoraja naevus		30	TRUE	TRUE
LOBSTER	5	PMF	122	713	Palinurus elephas		15	FALSE	FALSE
LOBSTER	5	PMF	122	714	Raja sp.			TRUE	FALSE
LOBSTER	5	PMF	122	715	Raja sp.			TRUE	FALSE
LOBSTER	5	PMF	122	716	Raja sp.			TRUE	FALSE
LOBSTER	5	PMF	122	717	Raja sp.			TRUE	FALSE
LOBSTER	5	PMF	123	718	Raja clavata		60	FALSE	FALSE
LOBSTER	5	PMF	123	719	Leucoraja naevus		40	TRUE	TRUE
LOBSTER	5	PMF	123	720	Leucoraja naevus		40	TRUE	TRUE
LOBSTER	5	PMF	123	721	Peristedion cataphractum			TRUE	FALSE
LOBSTER	5	PMF	123	722	Raja sp.			TRUE	FALSE
LOBSTER	5	PMF	124	723	Palinurus elephas		15	FALSE	FALSE
LOBSTER	5	PMF	124	724	Palinurus elephas		15	FALSE	FALSE
LOBSTER	5	PMF	124	725	Trigla lyra			TRUE	FALSE
LOBSTER	5	PMF	125	726	Raja sp.			TRUE	FALSE
LOBSTER	5	PMF	126	81	Raja sp.			TRUE	FALSE
LOBSTER	5	PMF	126	727	Palinurus elephas		15	FALSE	FALSE
LOBSTER	5	PMF	126	728	Trigla lyra			FALSE	FALSE
LOBSTER	5	PMF	126	729	Leucoraja naevus		40	TRUE	TRUE
LOBSTER	5	PMF	126	730	Leucoraja naevus		40	TRUE	TRUE
LOBSTER	5	PMF	127	82	Scorpaena scrofa		40	FALSE	FALSE
LOBSTER	5	PMF	127	83	Raja sp.			TRUE	FALSE
LOBSTER	5	PMF	128	84	Raja sp.			TRUE	FALSE
LOBSTER	5	PMF	129	85	Palinurus elephas		15	FALSE	FALSE
LOBSTER	5	PMF	129	86	Palinurus elephas		5	TRUE	TRUE
LOBSTER	5	PMF	129	87	Zeus faber			TRUE	FALSE
LOBSTER	5	PMF	130	88	Palinurus elephas		15	FALSE	FALSE
LOBSTER	5	PMF	130	89	Palinurus elephas		25	FALSE	FALSE
LOBSTER	5	PMF	130	90	Trigla lyra			FALSE	FALSE
LOBSTER	5	PMF	130	91	Leucoraja naevus			TRUE	FALSE
LOBSTER	5	PMF	130	92	Raja sp.			TRUE	FALSE
LOBSTER	5	PMF	130	93	Raja sp.			TRUE	FALSE
LOBSTER	5	PMF	130	94	Palinurus elephas		5	TRUE	TRUE
LOBSTER	5	PMF	130	95	Palinurus elephas		5	TRUE	TRUE
LOBSTER	5	PMF	131	96	Raja sp.			TRUE	FALSE
LOBSTER	5	PMF	131	97	Raja clavata		30	TRUE	TRUE
LOBSTER	5	PMF	132	98	Raja sp.			TRUE	FALSE
LOBSTER	5	PMF	132	99	Trigla lyra			TRUE	FALSE
LOBSTER	5	PMF	133	100	Raja sp.			TRUE	FALSE
LOBSTER	5	PMF	133	101	Raja sp.			TRUE	FALSE
LOBSTER	5	PMF	134	102	Scorpaena scrofa		40	FALSE	FALSE
LOBSTER	5	PMF	136	103	Leucoraja naevus		30	TRUE	TRUE
LOBSTER	5	PMF	137	104	Palinurus elephas		15	FALSE	FALSE
LOBSTER	5	PMF	137	105	Leucoraja naevus		40	TRUE	TRUE
LOBSTER	5	PMF	137	106	Trigla lyra			TRUE	FALSE
LOBSTER	6	PMF	138	107	Palinurus elephas			TRUE	FALSE
LOBSTER	6	PMF	138	108	Raja sp.			TRUE	FALSE
LOBSTER	6	PMF	140	109	Palinurus elephas		15	FALSE	FALSE
LOBSTER	6	PMF	141	110	Scorpaena scrofa			FALSE	FALSE
LOBSTER	6	PMF	141	111	Leucoraja naevus			TRUE	FALSE
LOBSTER	6	PMF	141	112	Raja sp.			TRUE	FALSE
LOBSTER	6	PMF	141	113	Zeus faber			TRUE	FALSE
LOBSTER	6	PMF	142	114	Trigla lyra			FALSE	FALSE
LOBSTER	6	PMF	142	115	Trigla lyra			TRUE	FALSE
LOBSTER	6	PMF	142	116	Trigla lyra			TRUE	FALSE
LOBSTER	6	PMF	142	117	Trigla lyra			TRUE	FALSE
LOBSTER	6	PMF	142	118	Raja sp.			TRUE	FALSE
LOBSTER	6	PMF	142	119	Stichopus regalis		20	TRUE	TRUE
LOBSTER	6	PMF	143	120	Trigla lyra		20	FALSE	FALSE
LOBSTER	6	PMF	143	121	Lophius piscatorius		40	FALSE	FALSE
LOBSTER	6	PMF	146	122	Leucoraja naevus		40	TRUE	FALSE
LOBSTER	6	PMF	147	123	Raja sp.			TRUE	FALSE
LOBSTER	6	PMF	148	124	Palinurus elephas		25	FALSE	FALSE
LOBSTER	6	PMF	148	125	Peristedion cataphractum		20	FALSE	FALSE
LOBSTER	6	PMF	149	126	Pagellus erythrinus		20	FALSE	FALSE
LOBSTER	6	PMF	149	127	Calappa granulata		10	FALSE	FALSE
LOBSTER	6	PMF	149	128	Leucoraja naevus			TRUE	FALSE
LOBSTER	6	PMF	150	129	Trigla lyra		20	FALSE	FALSE
LOBSTER	6	PMF	151	130	Trigla lyra		30	FALSE	FALSE
LOBSTER	6	PMF	151	131	Trigla lyra			TRUE	FALSE
LOBSTER	6	PMF	151	132	Peristedion cataphractum			TRUE	FALSE
LOBSTER	6	PMF	152	133	Trigla lyra			FALSE	FALSE
LOBSTER	6	PMF	152	134	Scyliorhinus canicula			TRUE	FALSE
LOBSTER	6	PMF	152	135	Raja clavata		30	TRUE	TRUE
LOBSTER	6	PMF	152	136	Scorpaena scrofa		20	TRUE	TRUE
LOBSTER	6	PMF	152	137	Trigla lyra			TRUE	FALSE
LOBSTER	6	PMF	153	138	Raja sp.			TRUE	FALSE
LOBSTER	6	PMF	155	139	Trigla lyra		30	FALSE	FALSE
LOBSTER	6	PMF	155	140	Trachinus sp.			TRUE	FALSE
LOBSTER	6	PMF	155	141	Raja sp.			TRUE	FALSE
LOBSTER	6	PMF	155	142	Trigla lyra			TRUE	FALSE
LOBSTER	6	PMF	155	143	Leucoraja naevus			TRUE	FALSE
LOBSTER	6	PMF	156	144	Trigla lyra		30	FALSE	FALSE
LOBSTER	6	PMF	157	145	Trigla lyra		30	FALSE	FALSE
LOBSTER	6	PMF	157	146	Raja sp.			TRUE	FALSE
LOBSTER	6	PMF	160	147	Scorpaena scrofa			TRUE	FALSE
LOBSTER	6	PMF	161	148	Trigla lyra		20	FALSE	FALSE
LOBSTER	6	PMF	161	149	Trigla lyra		30	FALSE	FALSE
LOBSTER	6	PMF	161	150	Palinurus elephas		25	FALSE	FALSE
LOBSTER	6	PMF	161	151	Raja sp.			TRUE	FALSE
LOBSTER	6	PMF	164	152	Palinurus elephas		15	FALSE	FALSE
LOBSTER	6	PMF	165	153	Trigla lyra		30	FALSE	FALSE
LOBSTER	6	PMF	165	154	Trigla lyra			TRUE	FALSE
LOBSTER	6	PMF	166	155	Raja sp.			TRUE	FALSE
LOBSTER	6	PMF	167	156	Palinurus elephas		15	FALSE	FALSE
LOBSTER	6	PMF	167	157	Palinurus elephas		5	TRUE	TRUE
LOBSTER	6	PMF	167	158	Raja sp.			TRUE	FALSE
LOBSTER	7	PMF	169	159	Leucoraja naevus		30	TRUE	TRUE
LOBSTER	7	PMF	170	160	Raja sp.			TRUE	FALSE
LOBSTER	7	PMF	171	161	Palinurus elephas		15	FALSE	FALSE
LOBSTER	7	PMF	172	162	Leucoraja naevus		30	TRUE	TRUE
LOBSTER	7	PMF	172	163	Leucoraja naevus		40	TRUE	FALSE
LOBSTER	7	PMF	172	164	Leucoraja naevus		40	TRUE	FALSE
LOBSTER	7	PMF	172	165	Raja sp.			TRUE	FALSE
LOBSTER	7	PMF	173	166	Palinurus elephas		5	TRUE	TRUE
LOBSTER	7	PMF	173	167	Palinurus elephas		5	TRUE	TRUE
LOBSTER	7	PMF	173	168	Palinurus elephas		5	TRUE	TRUE
LOBSTER	7	PMF	175	169	Palinurus elephas		15	FALSE	FALSE
LOBSTER	7	PMF	175	170	Palinurus elephas		25	FALSE	FALSE
LOBSTER	7	PMF	175	171	Scorpaena scrofa		30	FALSE	FALSE
LOBSTER	7	PMF	175	172	Scorpaena scrofa		40	FALSE	FALSE
LOBSTER	7	PMF	175	173	Leucoraja naevus		30	TRUE	FALSE
LOBSTER	7	PMF	175	174	Leucoraja naevus		40	TRUE	FALSE
LOBSTER	7	PMF	175	175	Lophius piscatorius		40	FALSE	FALSE
LOBSTER	7	PMF	175	176	Palinurus elephas		5	TRUE	TRUE
LOBSTER	7	PMF	175	177	Palinurus elephas		5	TRUE	TRUE
LOBSTER	7	PMF	176	178	Raja sp.			TRUE	FALSE
LOBSTER	7	PMF	178	179	Palinurus elephas		15	FALSE	FALSE
LOBSTER	7	PMF	179	180	Trigla lyra			TRUE	FALSE
LOBSTER	7	PMF	182	181	Raja sp.			TRUE	FALSE
LOBSTER	7	PMF	182	182	Palinurus elephas		15	FALSE	FALSE
LOBSTER	7	PMF	182	183	Stichopus regalis		20	TRUE	TRUE
LOBSTER	7	PMF	182	184	Trigla lyra			FALSE	FALSE
LOBSTER	7	PMF	182	185	Raja sp.			TRUE	FALSE
LOBSTER	7	PMF	183	186	Raja sp.			TRUE	FALSE
LOBSTER	7	PMF	183	187	Palinurus elephas		15	FALSE	FALSE
LOBSTER	7	PMF	183	188	Leucoraja naevus		40	TRUE	TRUE
LOBSTER	7	PMF	183	189	Raja sp.			TRUE	FALSE
LOBSTER	7	PMF	184	190	Zeus faber			TRUE	FALSE
LOBSTER	7	PMF	185	191	Leucoraja naevus			TRUE	FALSE
LOBSTER	7	PMF	186	192	Leucoraja naevus		30	TRUE	FALSE
LOBSTER	7	PMF	187	193	Lophius piscatorius		20	TRUE	TRUE
LOBSTER	7	PMF	187	194	Scorpaena scrofa		40	FALSE	FALSE
LOBSTER	7	PMF	189	195	Zeus faber			TRUE	FALSE
LOBSTER	7	PMF	189	196	Raja sp.			TRUE	FALSE
LOBSTER	7	PMF	190	197	Palinurus elephas		15	FALSE	FALSE
LOBSTER	7	PMF	190	198	Palinurus elephas		15	FALSE	FALSE
LOBSTER	7	PMF	190	199	Leucoraja naevus		30	TRUE	TRUE
LOBSTER	7	PMF	190	200	Merluccius merluccius			TRUE	FALSE
LOBSTER	7	PMF	191	201	Leucoraja naevus		40	TRUE	FALSE
LOBSTER	7	PMF	191	202	Leucoraja naevus		40	TRUE	FALSE
LOBSTER	7	PMF	191	203	Zeus faber			TRUE	FALSE
LOBSTER	7	PMF	191	204	Palinurus elephas		15	FALSE	FALSE
LOBSTER	7	PMF	191	205	Palinurus elephas		25	FALSE	FALSE
LOBSTER	7	PMF	194	206	Leucoraja naevus		40	TRUE	FALSE
LOBSTER	7	PMF	195	207	Palinurus elephas			TRUE	FALSE
LOBSTER	7	PMF	195	208	Zeus faber			TRUE	FALSE
LOBSTER	7	PMF	196	209	Leucoraja naevus		30	TRUE	FALSE
LOBSTER	8	PMF	199	210	Leucoraja naevus		40	TRUE	FALSE
LOBSTER	8	PMF	200	211	Lophius piscatorius		40	FALSE	FALSE
LOBSTER	8	PMF	200	212	Leucoraja naevus		30	TRUE	FALSE
LOBSTER	8	PMF	200	213	Leucoraja naevus		40	TRUE	FALSE
LOBSTER	8	PMF	201	214	Palinurus elephas		15	FALSE	FALSE
LOBSTER	8	PMF	201	215	Raja sp.			TRUE	FALSE
LOBSTER	8	PMF	202	216	Palinurus elephas		15	FALSE	FALSE
LOBSTER	8	PMF	202	217	Palinurus elephas		15	FALSE	FALSE
LOBSTER	8	PMF	202	218	Palinurus elephas		15	FALSE	FALSE
LOBSTER	8	PMF	202	219	Leucoraja naevus		30	TRUE	FALSE
LOBSTER	8	PMF	202	220	Leucoraja naevus		30	TRUE	FALSE
LOBSTER	8	PMF	202	221	Leucoraja naevus		40	TRUE	TRUE
LOBSTER	8	PMF	203	222	Leucoraja naevus		40	TRUE	FALSE
LOBSTER	8	PMF	203	223	Raja sp.			TRUE	FALSE
LOBSTER	8	PMF	203	224	Raja sp.			TRUE	FALSE
LOBSTER	8	PMF	204	225	Lophius piscatorius		40	FALSE	FALSE
LOBSTER	8	PMF	209	226	Trigla lyra		20	FALSE	FALSE
LOBSTER	8	PMF	209	227	Leucoraja naevus		40	TRUE	FALSE
LOBSTER	8	PMF	209	373	Trigla lyra			TRUE	FALSE
LOBSTER	8	PMF	210	374	Palinurus elephas		15	FALSE	FALSE
LOBSTER	8	PMF	210	375	Leucoraja naevus		30	TRUE	FALSE
LOBSTER	8	PMF	211	376	Leucoraja naevus		30	TRUE	FALSE
LOBSTER	8	PMF	211	377	Palinurus elephas		5	TRUE	TRUE
LOBSTER	8	PMF	211	378	Raja sp.			TRUE	FALSE
LOBSTER	8	PMF	211	379	Stichopus regalis		20	TRUE	TRUE
LOBSTER	8	PMF	212	380	Palinurus elephas		25	FALSE	FALSE
LOBSTER	8	PMF	212	381	Palinurus elephas		5	TRUE	TRUE
LOBSTER	8	PMF	212	382	Raja sp.			TRUE	FALSE
LOBSTER	8	PMF	212	383	Raja sp.			TRUE	FALSE
LOBSTER	8	PMF	212	384	Raja sp.			TRUE	FALSE
LOBSTER	8	PMF	213	385	Trigla lyra			TRUE	FALSE
LOBSTER	8	PMF	213	386	Palinurus elephas			TRUE	FALSE
LOBSTER	8	PMF	215	387	Palinurus elephas		15	FALSE	FALSE
LOBSTER	8	PMF	215	388	Palinurus elephas		15	FALSE	FALSE
LOBSTER	8	PMF	215	389	Lophius piscatorius			TRUE	FALSE
LOBSTER	8	PMF	219	390	Leucoraja naevus		40	TRUE	FALSE
LOBSTER	8	PMF	221	391	Palinurus elephas		15	FALSE	FALSE
LOBSTER	8	PMF	221	392	Scorpaena scrofa		40	FALSE	FALSE
LOBSTER	8	PMF	221	393	Scorpaena scrofa			TRUE	FALSE
LOBSTER	8	PMF	222	394	Palinurus elephas		25	FALSE	FALSE
LOBSTER	8	PMF	222	395	Scyliorhinus canicula			TRUE	FALSE
LOBSTER	8	PMF	223	396	Palinurus elephas		15	FALSE	FALSE
LOBSTER	8	PMF	223	397	Palinurus elephas		25	FALSE	FALSE
LOBSTER	8	PMF	223	398	Raja sp.			TRUE	FALSE
LOBSTER	8	PMF	224	399	Palinurus elephas		5	TRUE	TRUE
LOBSTER	8	PMF	225	400	Leucoraja naevus		30	TRUE	TRUE
LOBSTER	8	PMF	225	401	Raja sp.			TRUE	FALSE
LOBSTER	8	PMF	225	402	Raja sp.			TRUE	FALSE
LOBSTER	8	PMF	226	403	Raja clavata		50	FALSE	FALSE
LOBSTER	8	PMF	226	404	Raja sp.			TRUE	FALSE
LOBSTER	8	PMF	227	405	Leucoraja naevus		40	TRUE	FALSE
LOBSTER	8	PMF	227	406	Raja sp.			TRUE	FALSE
LOBSTER	8	PMF	228	407	Raja sp.			TRUE	FALSE
LOBSTER	9	PMF	230	408	Raja sp.			TRUE	FALSE
LOBSTER	9	PMF	232	409	Raja clavata		50	FALSE	FALSE
LOBSTER	9	PMF	232	410	Lophius piscatorius		40	FALSE	FALSE
LOBSTER	9	PMF	234	411	Lophius piscatorius		40	FALSE	FALSE
LOBSTER	9	PMF	234	412	Palinurus elephas		5	TRUE	TRUE
LOBSTER	9	PMF	234	413	Palinurus elephas			TRUE	FALSE
LOBSTER	9	PMF	236	414	Palinurus elephas		15	FALSE	FALSE
LOBSTER	9	PMF	236	415	Lophius piscatorius		40	FALSE	FALSE
LOBSTER	9	PMF	237	416	Palinurus elephas		15	FALSE	FALSE
LOBSTER	9	PMF	237	417	Raja sp.			TRUE	FALSE
LOBSTER	9	PMF	238	418	Raja sp.			TRUE	FALSE
LOBSTER	9	PMF	239	419	Palinurus elephas		15	FALSE	FALSE
LOBSTER	9	PMF	239	420	Peristedion cataphractum		20	FALSE	FALSE
LOBSTER	9	PMF	239	421	Pagrus pagrus			TRUE	FALSE
LOBSTER	9	PMF	240	422	Leucoraja naevus		30	TRUE	FALSE
LOBSTER	9	PMF	241	423	Raja sp.			TRUE	FALSE
LOBSTER	9	PMF	243	424	Palinurus elephas		25	FALSE	FALSE
LOBSTER	9	PMF	243	425	Calappa granulata		10	FALSE	FALSE
LOBSTER	9	PMF	244	426	Palinurus elephas		15	FALSE	FALSE
LOBSTER	9	PMF	244	427	Palinurus elephas		15	FALSE	FALSE
LOBSTER	9	PMF	244	428	Palinurus elephas		5	TRUE	TRUE
LOBSTER	9	PMF	244	429	Raja clavata		30	TRUE	TRUE
LOBSTER	9	PMF	246	430	Palinurus elephas		25	FALSE	FALSE
LOBSTER	9	PMF	246	431	Palinurus elephas		15	FALSE	FALSE
LOBSTER	9	PMF	246	432	Scorpaena scrofa		40	FALSE	FALSE
LOBSTER	9	PMF	247	433	Palinurus elephas		15	FALSE	FALSE
LOBSTER	9	PMF	247	434	Palinurus elephas		5	TRUE	TRUE
LOBSTER	9	PMF	248	435	Leucoraja naevus		30	TRUE	TRUE
LOBSTER	9	PMF	248	436	Lophius piscatorius			TRUE	FALSE
LOBSTER	9	PMF	249	437	Palinurus elephas		15	FALSE	FALSE
LOBSTER	9	PMF	251	438	Trigla lyra		30	FALSE	FALSE
LOBSTER	9	PMF	251	439	Raja sp.			TRUE	FALSE
LOBSTER	9	PMF	251	440	Raja sp.			TRUE	FALSE
LOBSTER	9	PMF	251	441	Raja sp.			TRUE	FALSE
LOBSTER	9	PMF	253	442	Leucoraja naevus		30	TRUE	FALSE
LOBSTER	9	PMF	253	443	Leucoraja naevus		40	TRUE	FALSE
LOBSTER	9	PMF	254	444	Palinurus elephas		25	FALSE	FALSE
LOBSTER	9	PMF	254	445	Palinurus elephas		15	FALSE	FALSE
LOBSTER	9	PMF	255	446	Scorpaena scrofa		50	FALSE	FALSE
LOBSTER	9	PMF	258	447	Peristedion cataphractum		30	FALSE	FALSE
LOBSTER	9	PMF	258	448	Raja sp.			TRUE	FALSE
LOBSTER	9	PMF	259	449	Raja clavata		50	FALSE	FALSE
LOBSTER	9	PMF	259	450	Palinurus elephas		15	FALSE	FALSE
LOBSTER	9	PMF	259	451	Scorpaena scrofa		40	FALSE	FALSE
LOBSTER	9	PMF	259	452	Raja clavata		50	FALSE	FALSE
LOBSTER	9	PMF	259	453	Lophius piscatorius			TRUE	FALSE
LOBSTER	10	PMF	262	454	Raja clavata		60	FALSE	FALSE
LOBSTER	10	PMF	264	455	Palinurus elephas		15	FALSE	FALSE
LOBSTER	10	PMF	265	456	Scyliorhinus canicula		40	TRUE	FALSE
LOBSTER	10	PMF	266	457	Lophius piscatorius		30	FALSE	FALSE
LOBSTER	10	PMF	266	458	Trigla lyra			TRUE	FALSE
LOBSTER	10	PMF	267	459	Raja clavata		30	TRUE	TRUE
LOBSTER	10	PMF	270	460	Trigla lyra		30	FALSE	FALSE
LOBSTER	10	PMF	270	461	Palinurus elephas		15	FALSE	FALSE
LOBSTER	10	PMF	270	462	Merluccius merluccius			TRUE	FALSE
LOBSTER	10	PMF	273	463	Raja sp.			TRUE	FALSE
LOBSTER	10	PMF	274	464	Scorpaena scrofa		50	FALSE	FALSE
LOBSTER	10	PMF	274	465	Leucoraja naevus		40	TRUE	FALSE
LOBSTER	10	PMF	274	466	Leucoraja naevus		40	TRUE	FALSE
LOBSTER	10	PMF	275	467	Lophius piscatorius		40	FALSE	FALSE
LOBSTER	10	PMF	275	468	Scorpaena scrofa			TRUE	FALSE
LOBSTER	10	PMF	275	469	Stichopus regalis		20	TRUE	FALSE
LOBSTER	10	PMF	276	470	Raja clavata		50	FALSE	FALSE
LOBSTER	10	PMF	276	471	Raja sp.			TRUE	FALSE
LOBSTER	10	PMF	276	472	Peristedion cataphractum			TRUE	FALSE
LOBSTER	10	PMF	277	473	Raja sp.			TRUE	FALSE
LOBSTER	10	PMF	280	474	Scyliorhinus canicula		50	TRUE	TRUE
LOBSTER	10	PMF	280	475	Phycis sp.			TRUE	FALSE
LOBSTER	10	PMF	280	476	Stichopus regalis		20	TRUE	TRUE
LOBSTER	10	PMF	281	477	Palinurus elephas		15	FALSE	FALSE
LOBSTER	10	PMF	281	478	Raja sp.			TRUE	FALSE
LOBSTER	10	PMF	282	479	Scorpaena scrofa		40	FALSE	FALSE
LOBSTER	10	PMF	282	480	Scorpaena scrofa		50	FALSE	FALSE
LOBSTER	10	PMF	282	481	Leucoraja naevus		30	TRUE	FALSE
LOBSTER	10	PMF	282	482	Stichopus regalis		20	TRUE	TRUE
LOBSTER	10	PMF	282	483	Stichopus regalis		20	TRUE	TRUE
LOBSTER	10	PMF	282	484	Calappa granulata		10	FALSE	FALSE
LOBSTER	10	PMF	282	485	Raja sp.			TRUE	FALSE
LOBSTER	10	PMF	282	486	Calappa granulata		10	TRUE	FALSE
LOBSTER	10	PMF	283	487	Palinurus elephas		15	FALSE	FALSE
LOBSTER	10	PMF	283	488	Raja clavata		40	FALSE	FALSE
LOBSTER	10	PMF	283	489	Raja clavata		50	FALSE	FALSE
LOBSTER	10	PMF	283	490	Leucoraja naevus		40	TRUE	TRUE
LOBSTER	10	PMF	283	491	Stichopus regalis		20	TRUE	FALSE
LOBSTER	10	PMF	283	492	Scyliorhinus canicula			TRUE	FALSE
LOBSTER	10	PMF	283	493	Raja sp.			TRUE	FALSE
LOBSTER	10	PMF	284	494	Raja clavata		50	FALSE	FALSE
LOBSTER	10	PMF	284	495	Raja clavata		50	FALSE	FALSE
LOBSTER	10	PMF	284	496	Leucoraja naevus		40	TRUE	FALSE
LOBSTER	10	PMF	284	497	Trigla lyra			FALSE	FALSE
LOBSTER	10	PMF	284	498	Raja sp.			TRUE	FALSE
LOBSTER	10	PMF	284	499	Raja sp.			TRUE	FALSE
LOBSTER	10	PMF	285	500	Raja clavata		60	FALSE	FALSE
LOBSTER	10	PMF	285	501	Raja clavata		50	FALSE	FALSE
LOBSTER	10	PMF	285	502	Leucoraja naevus		30	TRUE	FALSE
LOBSTER	10	PMF	285	503	Raja sp.			TRUE	FALSE
LOBSTER	10	PMF	285	504	Raja sp.			TRUE	FALSE
LOBSTER	10	PMF	285	505	Raja sp.			TRUE	FALSE
LOBSTER	10	PMF	285	506	Raja sp.			TRUE	TRUE
LOBSTER	10	PMF	286	507	Palinurus elephas		25	FALSE	FALSE
LOBSTER	10	PMF	286	508	Leucoraja naevus		40	TRUE	FALSE
LOBSTER	10	PMF	286	509	Raja sp.			TRUE	FALSE
LOBSTER	10	PMF	286	510	Raja clavata		30	TRUE	TRUE
LOBSTER	10	PMF	288	511	Raja clavata		40	FALSE	FALSE
LOBSTER	10	PMF	288	512	Raja clavata		50	FALSE	FALSE
LOBSTER	10	PMF	288	513	Leucoraja naevus		40	TRUE	TRUE
LOBSTER	10	PMF	288	514	Raja sp.			TRUE	FALSE
LOBSTER	10	PMF	288	515	Raja sp.			TRUE	FALSE
LOBSTER	10	PMF	288	516	Raja sp.			TRUE	FALSE
LOBSTER	10	PMF	288	517	Lophius piscatorius		40	TRUE	FALSE
LOBSTER	10	PMF	289	518	Trigla lyra			TRUE	FALSE
LOBSTER	10	PMF	289	533	Raja sp.			TRUE	FALSE
LOBSTER	10	PMF	289	534	Scorpaena scrofa			TRUE	FALSE
LOBSTER	10	PMF	290	535	Raja clavata		50	FALSE	FALSE
LOBSTER	10	PMF	290	536	Raja clavata			TRUE	FALSE
LOBSTER	10	PMF	291	537	Raja clavata		60	FALSE	FALSE
LOBSTER	10	PMF	291	538	Stichopus regalis		20	TRUE	FALSE
LOBSTER	10	PMF	291	539	Raja sp.			TRUE	FALSE
LOBSTER	10	PMF	291	540	Raja sp.			TRUE	FALSE
LOBSTER	10	PMF	291	541	Raja clavata		30	TRUE	TRUE
LOBSTER	10	PMF	291	542	Trigla lyra			TRUE	FALSE
LOBSTER	11	PMF	292	543	Raja clavata		30	TRUE	FALSE
LOBSTER	11	PMF	293	544	Raja sp.			TRUE	FALSE
LOBSTER	11	PMF	294	545	Leucoraja naevus		30	TRUE	FALSE
LOBSTER	11	PMF	295	546	Raja sp.			TRUE	FALSE
LOBSTER	11	PMF	296	547	Leucoraja naevus		30	TRUE	FALSE
LOBSTER	11	PMF	296	548	Raja sp.			TRUE	FALSE
LOBSTER	11	PMF	297	549	Raja sp.			TRUE	FALSE
LOBSTER	11	PMF	297	550	Raja sp.			TRUE	FALSE
LOBSTER	11	PMF	297	551	Leucoraja naevus		30	TRUE	FALSE
LOBSTER	11	PMF	298	552	Raja clavata		30	TRUE	TRUE
LOBSTER	11	PMF	298	553	Raja clavata		70	FALSE	FALSE
LOBSTER	11	PMF	301	556	Raja clavata		30	TRUE	FALSE
LOBSTER	11	PMF	301	557	Raja clavata		30	TRUE	FALSE
LOBSTER	11	PMF	301	3491	Dardanus arrosor		10	TRUE	TRUE
LOBSTER	11	PMF	302	558	Raja clavata			TRUE	FALSE
LOBSTER	11	PMF	302	559	Palinurus elephas		25	FALSE	FALSE
LOBSTER	11	PMF	302	560	Palinurus elephas		25	FALSE	FALSE
LOBSTER	11	PMF	302	561	Palinurus elephas		25	FALSE	FALSE
LOBSTER	11	PMF	303	562	Calappa granulata		10	TRUE	TRUE
LOBSTER	11	PMF	303	563	Raja clavata		30	TRUE	FALSE
LOBSTER	11	PMF	304	565	Raja clavata			TRUE	FALSE
LOBSTER	11	PMF	304	566	Raja clavata		70	FALSE	FALSE
LOBSTER	11	PMF	305	567	Raja sp.			TRUE	FALSE
LOBSTER	11	PMF	305	568	Raja sp.			TRUE	FALSE
LOBSTER	11	PMF	307	3494	Trachinus draco		10	TRUE	FALSE
LOBSTER	11	PMF	307	3495	Raja sp.		40	TRUE	FALSE
LOBSTER	11	PMF	307	3496	Raja sp.		30	TRUE	FALSE
LOBSTER	11	PMF	307	3497	Raja sp.		30	TRUE	FALSE
LOBSTER	11	PMF	308	569	Raja clavata		40	TRUE	FALSE
LOBSTER	11	PMF	308	3498	Raja clavata		50	FALSE	FALSE
LOBSTER	11	PMF	308	3499	Raja sp.			TRUE	FALSE
LOBSTER	11	PMF	308	3500	Raja clavata		40	TRUE	FALSE
LOBSTER	11	PMF	308	3501	Raja sp.			TRUE	FALSE
LOBSTER	11	PMF	308	3502	Raja clavata		30	TRUE	TRUE
LOBSTER	11	PMF	310	571	Raja sp.			TRUE	FALSE
LOBSTER	11	PMF	312	580	Raja sp.			TRUE	FALSE
LOBSTER	11	PMF	314	581	Raja sp.			TRUE	FALSE
LOBSTER	11	PMF	314	3504	Scyliorhinus canicula		40	TRUE	FALSE
LOBSTER	11	PMF	314	3505	Leucoraja naevus		40	TRUE	FALSE
LOBSTER	11	PMF	2321	3492	Raja sp.			TRUE	FALSE
LOBSTER	11	PMF	2321	3493	Raja clavata		30	TRUE	FALSE
LOBSTER	11	PMF	2322	3503	Raja sp.			TRUE	FALSE
LOBSTER	12	PMF	320	585	Scorpaena scrofa			TRUE	FALSE
LOBSTER	12	PMF	320	586	Raja sp.			TRUE	FALSE
LOBSTER	12	PMF	326	587	Palinurus elephas		15	FALSE	FALSE
LOBSTER	12	PMF	327	3506	Palinurus elephas		15	FALSE	FALSE
LOBSTER	12	PMF	327	3507	ND			TRUE	FALSE
LOBSTER	12	PMF	328	589	Palinurus elephas		5	TRUE	TRUE
LOBSTER	12	PMF	328	590	Palinurus elephas		5	TRUE	TRUE
LOBSTER	12	PMF	329	591	Scyliorhinus canicula		40	TRUE	FALSE
LOBSTER	12	PMF	335	592	Palinurus elephas		15	FALSE	FALSE
LOBSTER	12	PMF	337	593	Scorpaena scrofa		50	FALSE	FALSE
LOBSTER	12	PMF	344	594	Palinurus elephas		15	FALSE	FALSE
LOBSTER	13	PMF	350	595	Lophius piscatorius		40	FALSE	FALSE
LOBSTER	13	PMF	351	596	Raja clavata		50	FALSE	FALSE
LOBSTER	13	MMF	352	597	Raja clavata			TRUE	FALSE
LOBSTER	13	MMF	352	598	Raja clavata			TRUE	FALSE
LOBSTER	13	MMF	352	599	Raja clavata			TRUE	FALSE
LOBSTER	13	MMF	352	600	Raja clavata			TRUE	FALSE
LOBSTER	13	MMF	352	601	Raja clavata		50	FALSE	FALSE
LOBSTER	13	MMF	352	602	Raja clavata		60	FALSE	FALSE
LOBSTER	13	MMF	352	603	Palinurus elephas		15	FALSE	FALSE
LOBSTER	13	MMF	352	604	Palinurus elephas		15	FALSE	FALSE
LOBSTER	13	MMF	353	605	Palinurus elephas			TRUE	FALSE
LOBSTER	13	MMF	353	606	Palinurus elephas			TRUE	FALSE
LOBSTER	13	MMF	353	607	Raja clavata			TRUE	FALSE
LOBSTER	13	MMF	354	608	Raja clavata			TRUE	FALSE
LOBSTER	13	MMF	354	609	Lophius piscatorius		40	FALSE	FALSE
LOBSTER	13	MMF	354	610	Lophius piscatorius		50	FALSE	FALSE
LOBSTER	13	MMF	354	611	Lophius piscatorius			TRUE	FALSE
LOBSTER	13	MMF	354	612	Torpedo marmorata		60	TRUE	FALSE
LOBSTER	13	MMF	354	613	Palinurus elephas		15	FALSE	FALSE
LOBSTER	13	MMF	355	614	Lophius piscatorius			TRUE	FALSE
LOBSTER	13	MMF	355	615	Lophius piscatorius			TRUE	FALSE
LOBSTER	13	MMF	355	616	Palinurus elephas		15	FALSE	FALSE
LOBSTER	13	MMF	355	617	Palinurus elephas		15	FALSE	FALSE
LOBSTER	13	MMF	355	618	Scorpaena scrofa		30	TRUE	FALSE
LOBSTER	13	MMF	355	619	Raja clavata		30	TRUE	FALSE
LOBSTER	13	MMF	356	620	Palinurus elephas		5	TRUE	TRUE
LOBSTER	13	MMF	356	621	Palinurus elephas		15	TRUE	FALSE
LOBSTER	13	MMF	356	622	Raja clavata		50	FALSE	FALSE
LOBSTER	13	PMF	358	623	Lophius piscatorius			TRUE	FALSE
LOBSTER	13	PMF	358	624	Lophius piscatorius			TRUE	FALSE
LOBSTER	13	PMF	358	625	Torpedo marmorata		50	TRUE	FALSE
LOBSTER	13	PMF	358	626	Torpedo marmorata		60	TRUE	FALSE
LOBSTER	13	PMF	358	627	Raja clavata		50	FALSE	FALSE
LOBSTER	13	PMF	358	628	Raja clavata		40	FALSE	FALSE
LOBSTER	13	PMF	359	629	Raja clavata		50	FALSE	FALSE
LOBSTER	13	PMF	359	630	Lophius piscatorius		50	FALSE	FALSE
LOBSTER	13	PMF	359	631	Lophius piscatorius		40	FALSE	FALSE
LOBSTER	13	PMF	360	632	Torpedo marmorata		60	TRUE	FALSE
LOBSTER	13	PMF	360	633	Raja clavata		40	FALSE	FALSE
LOBSTER	13	PMF	360	634	Raja clavata		50	FALSE	FALSE
LOBSTER	13	PMF	360	635	Lophius piscatorius			TRUE	FALSE
LOBSTER	13	PMF	361	636	Lophius piscatorius			TRUE	FALSE
LOBSTER	13	PMF	362	637	Lophius piscatorius		40	FALSE	FALSE
LOBSTER	13	PMF	362	638	Lophius piscatorius		40	FALSE	FALSE
LOBSTER	13	PMF	362	639	Scorpaena scrofa			TRUE	FALSE
LOBSTER	13	PMF	362	640	Scorpaena scrofa			TRUE	FALSE
LOBSTER	13	PMF	362	641	Scorpaena scrofa			TRUE	FALSE
LOBSTER	13	PMF	362	642	Scyliorhinus canicula		40	TRUE	FALSE
LOBSTER	13	PMF	363	643	Scyliorhinus canicula		30	TRUE	FALSE
LOBSTER	13	PMF	363	644	Scyliorhinus canicula		30	TRUE	FALSE
LOBSTER	13	PMF	363	645	Lophius piscatorius		40	FALSE	FALSE
LOBSTER	13	PMF	364	646	Palinurus elephas		15	TRUE	FALSE
LOBSTER	13	PMF	364	647	Palinurus elephas		5	TRUE	TRUE
LOBSTER	13	PMF	364	648	Raja clavata		40	FALSE	FALSE
LOBSTER	13	PMF	364	649	Raja clavata		50	FALSE	FALSE
LOBSTER	13	PMF	364	650	Raja clavata		50	FALSE	FALSE
LOBSTER	13	PMF	364	651	Lophius piscatorius		40	FALSE	FALSE
LOBSTER	13	PMF	365	652	Scyliorhinus canicula		40	TRUE	FALSE
LOBSTER	13	PMF	365	653	Scyliorhinus canicula			TRUE	FALSE
LOBSTER	14	MMF	370	654	Scorpaena scrofa			TRUE	FALSE
LOBSTER	14	MMF	371	655	Scorpaena scrofa			TRUE	FALSE
LOBSTER	14	MMF	371	656	Lophius piscatorius		40	FALSE	FALSE
LOBSTER	14	MMF	372	657	Lophius piscatorius			TRUE	FALSE
LOBSTER	14	MMF	372	658	Lophius piscatorius			TRUE	FALSE
LOBSTER	14	MMF	372	659	Lophius piscatorius			TRUE	FALSE
LOBSTER	14	MMF	373	660	Lophius piscatorius			TRUE	FALSE
LOBSTER	14	MMF	373	661	Raja clavata			TRUE	FALSE
LOBSTER	14	MMF	373	662	Raja clavata		30	TRUE	TRUE
LOBSTER	14	MMF	374	663	Palinurus elephas		15	FALSE	FALSE
LOBSTER	14	MMF	374	664	Palinurus elephas		15	FALSE	FALSE
LOBSTER	14	MMF	374	665	Palinurus elephas		5	TRUE	TRUE
LOBSTER	14	MMF	374	666	Scorpaena scrofa			TRUE	FALSE
LOBSTER	14	MMF	374	667	Scorpaena scrofa			TRUE	FALSE
LOBSTER	14	MMF	374	668	Scorpaena scrofa			TRUE	FALSE
LOBSTER	14	MMF	374	669	Scorpaena scrofa		40	FALSE	FALSE
LOBSTER	14	MMF	374	670	Lophius piscatorius			TRUE	FALSE
LOBSTER	14	MMF	374	671	Raja clavata			TRUE	FALSE
LOBSTER	14	MMF	375	672	Raja clavata		50	FALSE	FALSE
LOBSTER	14	MMF	375	673	Raja clavata			TRUE	FALSE
LOBSTER	14	MMF	376	674	Raja clavata			TRUE	FALSE
LOBSTER	14	MMF	377	675	Lophius piscatorius		40	FALSE	FALSE
LOBSTER	14	MMF	377	676	Torpedo marmorata		50	TRUE	FALSE
LOBSTER	14	MMF	378	677	Raja clavata			TRUE	FALSE
LOBSTER	14	MMF	378	678	Torpedo marmorata		60	TRUE	FALSE
LOBSTER	14	MMF	379	679	Scorpaena scrofa			TRUE	FALSE
LOBSTER	14	MMF	380	731	Scyliorhinus canicula		30	TRUE	FALSE
LOBSTER	14	MMF	380	732	Scyliorhinus canicula		40	TRUE	FALSE
LOBSTER	14	MMF	380	733	Palinurus elephas		5	TRUE	TRUE
LOBSTER	14	MMF	380	734	Scorpaena scrofa			TRUE	FALSE
LOBSTER	14	MMF	382	735	Raja clavata			TRUE	FALSE
LOBSTER	14	MMF	382	736	Scorpaena scrofa		30	FALSE	FALSE
LOBSTER	14	MMF	383	737	Scyliorhinus canicula		40	TRUE	FALSE
LOBSTER	14	MMF	383	738	Scyliorhinus canicula		50	TRUE	FALSE
LOBSTER	14	MMF	383	739	Scorpaena scrofa		30	FALSE	FALSE
LOBSTER	14	MMF	383	740	Scorpaena scrofa		40	FALSE	FALSE
LOBSTER	14	MMF	383	741	Scorpaena scrofa			TRUE	FALSE
LOBSTER	14	MMF	383	742	Palinurus elephas		15	FALSE	FALSE
LOBSTER	14	MMF	383	743	Palinurus elephas			TRUE	FALSE
LOBSTER	14	MMF	383	744	Raja clavata		40	FALSE	FALSE
LOBSTER	14	MMF	383	745	Raja clavata			TRUE	FALSE
LOBSTER	14	MMF	384	746	Palinurus elephas		15	FALSE	FALSE
LOBSTER	14	MMF	384	747	Palinurus elephas		15	FALSE	FALSE
LOBSTER	14	MMF	384	748	Raja clavata			TRUE	FALSE
LOBSTER	14	MMF	384	749	Raja clavata			TRUE	FALSE
LOBSTER	14	MMF	384	750	Raja clavata			TRUE	FALSE
LOBSTER	14	MMF	384	751	Scorpaena scrofa			TRUE	FALSE
LOBSTER	14	MMF	385	752	Raja clavata			TRUE	FALSE
LOBSTER	14	MMF	385	753	Raja clavata			TRUE	FALSE
LOBSTER	14	MMF	386	754	Scorpaena scrofa		40	FALSE	FALSE
LOBSTER	14	MMF	386	755	Scorpaena scrofa			TRUE	FALSE
LOBSTER	14	MMF	386	756	Scorpaena scrofa			TRUE	FALSE
LOBSTER	14	MMF	386	757	Scorpaena scrofa			TRUE	FALSE
LOBSTER	14	MMF	386	758	Raja clavata		40	FALSE	FALSE
LOBSTER	14	MMF	386	759	Raja clavata		50	FALSE	FALSE
LOBSTER	14	MMF	386	760	Raja clavata		50	FALSE	FALSE
LOBSTER	14	MMF	386	761	Raja clavata		40	FALSE	FALSE
LOBSTER	14	MMF	386	762	Raja clavata			TRUE	FALSE
LOBSTER	14	MMF	386	763	Raja clavata			TRUE	FALSE
LOBSTER	14	MMF	386	764	Raja clavata			TRUE	FALSE
LOBSTER	14	MMF	386	765	Raja clavata			TRUE	FALSE
LOBSTER	14	MMF	386	766	Raja clavata			TRUE	FALSE
LOBSTER	14	MMF	386	767	Palinurus elephas		15	FALSE	FALSE
LOBSTER	14	MMF	386	768	Palinurus elephas		15	FALSE	FALSE
LOBSTER	14	MMF	386	769	Palinurus elephas			TRUE	FALSE
LOBSTER	14	MMF	386	770	Palinurus elephas			TRUE	FALSE
LOBSTER	14	MMF	388	771	Raja clavata			TRUE	FALSE
LOBSTER	14	MMF	388	772	Palinurus elephas		25	FALSE	FALSE
LOBSTER	14	MMF	388	773	Scorpaena scrofa		30	FALSE	FALSE
LOBSTER	14	MMF	388	774	Scorpaena scrofa			TRUE	FALSE
LOBSTER	14	MMF	388	775	Lophius piscatorius		40	FALSE	FALSE
LOBSTER	14	MMF	389	776	Raja clavata		50	FALSE	FALSE
LOBSTER	14	PMF	391	777	Palinurus elephas		15	FALSE	FALSE
LOBSTER	15	PMF	393	778	Palinurus elephas			TRUE	FALSE
LOBSTER	15	PMF	394	779	Raja clavata		50	FALSE	FALSE
LOBSTER	15	MMF	395	780	Scorpaena scrofa		40	FALSE	FALSE
LOBSTER	15	MMF	395	781	Scorpaena scrofa		40	FALSE	FALSE
LOBSTER	15	MMF	395	782	Scorpaena scrofa			TRUE	FALSE
LOBSTER	15	MMF	396	783	Scyliorhinus canicula		40	TRUE	FALSE
LOBSTER	15	MMF	396	784	Scyliorhinus canicula		50	TRUE	FALSE
LOBSTER	15	MMF	397	785	Scyliorhinus canicula		30	TRUE	FALSE
LOBSTER	15	MMF	397	786	Scyliorhinus canicula		40	TRUE	FALSE
LOBSTER	15	MMF	397	787	Scyliorhinus canicula		30	TRUE	FALSE
LOBSTER	15	MMF	397	788	Scyliorhinus canicula		40	TRUE	FALSE
LOBSTER	15	MMF	397	789	Scyliorhinus canicula		50	TRUE	FALSE
LOBSTER	15	MMF	397	790	Scyliorhinus canicula		40	TRUE	FALSE
LOBSTER	15	MMF	397	791	Scyliorhinus canicula		30	TRUE	FALSE
LOBSTER	15	MMF	397	792	Scyliorhinus canicula		50	TRUE	FALSE
LOBSTER	15	MMF	397	793	Scyliorhinus canicula		40	TRUE	FALSE
LOBSTER	15	MMF	397	794	Scyliorhinus canicula		40	TRUE	FALSE
LOBSTER	15	MMF	397	795	Scyliorhinus canicula		30	TRUE	FALSE
LOBSTER	15	MMF	397	796	Scyliorhinus canicula		40	TRUE	FALSE
LOBSTER	15	MMF	397	797	Scyliorhinus canicula		40	TRUE	FALSE
LOBSTER	15	MMF	397	798	Scyliorhinus canicula		30	TRUE	FALSE
LOBSTER	15	MMF	397	799	Scyliorhinus canicula		40	TRUE	FALSE
LOBSTER	15	MMF	397	800	Scorpaena scrofa			TRUE	FALSE
LOBSTER	15	MMF	397	801	Raja clavata			TRUE	FALSE
LOBSTER	15	MMF	398	802	Trachinus sp.			TRUE	FALSE
LOBSTER	15	MMF	398	803	Scyliorhinus canicula		40	TRUE	FALSE
LOBSTER	15	MMF	398	804	Scyliorhinus canicula		40	TRUE	FALSE
LOBSTER	15	MMF	398	805	Scyliorhinus canicula		50	TRUE	FALSE
LOBSTER	15	MMF	398	3509	Scyliorhinus canicula		30	TRUE	FALSE
LOBSTER	15	MMF	399	301	Scyliorhinus canicula		30	TRUE	FALSE
LOBSTER	15	MMF	399	302	Scyliorhinus canicula		40	TRUE	FALSE
LOBSTER	15	MMF	399	303	Scyliorhinus canicula		30	TRUE	FALSE
LOBSTER	15	MMF	399	304	Scyliorhinus canicula		40	TRUE	FALSE
LOBSTER	15	MMF	399	305	Scyliorhinus canicula		50	TRUE	FALSE
LOBSTER	15	MMF	399	306	Scyliorhinus canicula		40	TRUE	FALSE
LOBSTER	15	MMF	399	307	Scyliorhinus canicula		40	TRUE	FALSE
LOBSTER	15	MMF	399	308	Scyliorhinus canicula		30	TRUE	FALSE
LOBSTER	15	MMF	399	309	Trigla lyra			TRUE	FALSE
LOBSTER	15	MMF	399	806	Palinurus elephas		25	FALSE	FALSE
LOBSTER	15	MMF	399	807	Scyliorhinus canicula		40	TRUE	FALSE
LOBSTER	15	MMF	400	310	Stichopus regalis		20	TRUE	TRUE
LOBSTER	15	MMF	401	311	Scyliorhinus canicula			TRUE	FALSE
LOBSTER	15	MMF	401	312	Scyliorhinus canicula		30	TRUE	FALSE
LOBSTER	15	MMF	401	313	Stichopus regalis		20	TRUE	TRUE
LOBSTER	15	MMF	403	314	Scorpaena scrofa			TRUE	FALSE
LOBSTER	15	MMF	404	315	Stichopus regalis		20	TRUE	TRUE
LOBSTER	15	MMF	404	316	Palinurus elephas		5	TRUE	TRUE
LOBSTER	15	PMF	405	317	Holoturia sp.		20	TRUE	TRUE
LOBSTER	15	PMF	406	318	Palinurus elephas		25	FALSE	FALSE
LOBSTER	15	PMF	407	319	Scorpaena scrofa			TRUE	FALSE
LOBSTER	15	PMF	408	320	Raja clavata		30	TRUE	FALSE
LOBSTER	15	PMF	408	321	Raja clavata		60	TRUE	FALSE
LOBSTER	15	PMF	409	322	Scorpaena scrofa			TRUE	FALSE
LOBSTER	15	PMF	410	323	Scorpaena scrofa			TRUE	FALSE
LOBSTER	15	PMF	411	324	Palinurus elephas		25	FALSE	FALSE
LOBSTER	15	PMF	411	325	Palinurus elephas		15	FALSE	FALSE
LOBSTER	15	PMF	411	326	Palinurus elephas			TRUE	FALSE
LOBSTER	15	PMF	411	327	Scorpaena scrofa			TRUE	FALSE
LOBSTER	15	PMF	412	328	Scorpaena scrofa			TRUE	FALSE
LOBSTER	15	PMF	413	329	Raja clavata		30	TRUE	FALSE
LOBSTER	16	PMF	416	330	Scyliorhinus canicula		40	TRUE	FALSE
LOBSTER	16	PMF	417	331	Palinurus elephas		15	FALSE	FALSE
LOBSTER	16	PMF	417	332	Scorpaena scrofa			TRUE	FALSE
LOBSTER	16	PMF	417	333	Raja clavata			TRUE	FALSE
LOBSTER	16	PMF	418	334	Scorpaena scrofa		30	FALSE	FALSE
LOBSTER	16	PMF	419	335	Scorpaena scrofa		40	FALSE	FALSE
LOBSTER	16	PMF	419	336	Scorpaena scrofa		30	FALSE	FALSE
LOBSTER	16	PMF	419	337	Palinurus elephas		15	FALSE	FALSE
LOBSTER	16	PMF	419	338	Scorpaena scrofa			TRUE	FALSE
LOBSTER	16	PMF	419	339	Scorpaena scrofa			TRUE	FALSE
LOBSTER	16	PMF	419	340	Scorpaena scrofa			TRUE	FALSE
LOBSTER	16	PMF	420	341	Palinurus elephas		15	FALSE	FALSE
LOBSTER	16	PMF	420	342	Palinurus elephas		15	FALSE	FALSE
LOBSTER	16	PMF	422	343	Scorpaena scrofa		30	FALSE	FALSE
LOBSTER	16	PMF	422	344	Scorpaena scrofa			TRUE	FALSE
LOBSTER	16	PMF	422	345	Raja clavata			TRUE	FALSE
LOBSTER	16	PMF	424	346	Stichopus regalis		20	TRUE	TRUE
LOBSTER	16	PMF	424	347	Raja clavata			TRUE	FALSE
LOBSTER	16	PMF	425	348	Stichopus regalis		20	TRUE	TRUE
LOBSTER	16	PMF	425	349	Stichopus regalis		20	TRUE	TRUE
LOBSTER	16	PMF	426	350	Stichopus regalis		20	TRUE	TRUE
LOBSTER	16	PMF	426	351	Stichopus regalis		20	TRUE	TRUE
LOBSTER	16	PMF	427	352	Palinurus elephas		25	FALSE	FALSE
LOBSTER	16	PMF	428	353	Palinurus elephas		15	FALSE	FALSE
LOBSTER	16	PMF	428	354	Scorpaena scrofa			TRUE	FALSE
LOBSTER	16	PMF	429	355	Uranoscopus scaber		30	FALSE	FALSE
LOBSTER	16	PMF	429	356	Raja clavata		30	TRUE	FALSE
LOBSTER	16	PMF	430	357	Raja clavata		30	TRUE	FALSE
LOBSTER	16	PMF	430	358	Scorpaena scrofa			TRUE	FALSE
LOBSTER	16	PMF	430	359	Scorpaena scrofa			TRUE	FALSE
LOBSTER	16	PMF	430	360	Scorpaena scrofa		30	FALSE	FALSE
LOBSTER	16	PMF	431	361	Palinurus elephas		15	FALSE	FALSE
LOBSTER	16	PMF	431	362	Palinurus elephas		5	TRUE	TRUE
LOBSTER	16	PMF	431	363	Scorpaena scrofa		40	FALSE	FALSE
LOBSTER	16	PMF	431	364	Scorpaena scrofa			TRUE	FALSE
LOBSTER	16	PMF	431	365	Raja clavata			TRUE	FALSE
LOBSTER	16	PMF	432	366	Stichopus regalis		20	TRUE	TRUE
LOBSTER	16	PMF	434	367	Stichopus regalis		20	TRUE	TRUE
LOBSTER	16	PMF	434	368	Scorpaena scrofa			TRUE	FALSE
LOBSTER	16	PMF	435	369	Stichopus regalis		20	TRUE	TRUE
LOBSTER	16	PMF	435	370	Scorpaena scrofa			TRUE	FALSE
LOBSTER	16	PMF	435	371	Scorpaena scrofa			TRUE	FALSE
LOBSTER	16	PMF	436	519	Raja clavata			TRUE	FALSE
LOBSTER	16	PMF	439	522	Raja clavata			TRUE	FALSE
LOBSTER	16	PMF	439	523	Raja clavata			TRUE	FALSE
LOBSTER	16	PMF	439	524	Raja clavata		40	TRUE	FALSE
LOBSTER	16	PMF	439	525	Calappa granulata			TRUE	FALSE
LOBSTER	16	PMF	439	526	Stichopus regalis		20	TRUE	TRUE
LOBSTER	16	PMF	440	529	Raja clavata			TRUE	FALSE
LOBSTER	16	PMF	441	532	Palinurus elephas		15	FALSE	FALSE
LOBSTER	17	PMF	444	808	Palinurus elephas		15	FALSE	FALSE
LOBSTER	17	PMF	444	809	Palinurus elephas		5	TRUE	TRUE
LOBSTER	17	PMF	446	810	Lophius piscatorius		30	FALSE	FALSE
LOBSTER	17	PMF	447	811	Lophius piscatorius		40	FALSE	FALSE
LOBSTER	17	PMF	447	812	Lophius piscatorius			TRUE	FALSE
LOBSTER	17	PMF	447	813	Lophius piscatorius			TRUE	FALSE
LOBSTER	17	PMF	447	3510	Calappa granulata		10	TRUE	FALSE
LOBSTER	17	PMF	447	3511	Stichopus regalis		20	TRUE	TRUE
LOBSTER	17	PMF	447	3512	Stichopus regalis		20	TRUE	TRUE
LOBSTER	17	PMF	449	814	Phycis sp.			TRUE	FALSE
LOBSTER	17	PMF	450	815	Palinurus elephas		25	FALSE	FALSE
LOBSTER	17	PMF	451	816	Trigla lyra		30	TRUE	FALSE
LOBSTER	17	PMF	451	817	Palinurus elephas		25	FALSE	FALSE
LOBSTER	17	PMF	451	818	Lophius piscatorius			TRUE	FALSE
LOBSTER	17	PMF	453	819	Palinurus elephas		25	FALSE	FALSE
LOBSTER	17	PMF	453	820	Leucoraja naevus		40	TRUE	TRUE
LOBSTER	17	PMF	454	821	Leucoraja naevus			TRUE	FALSE
LOBSTER	17	PMF	455	824	Lophius piscatorius		50	FALSE	FALSE
LOBSTER	17	PMF	455	825	Palinurus elephas		25	FALSE	FALSE
LOBSTER	17	PMF	457	826	Leucoraja naevus		50	TRUE	TRUE
LOBSTER	17	PMF	459	3513	Stichopus regalis		20	TRUE	TRUE
LOBSTER	17	PMF	460	827	Leucoraja naevus		40	TRUE	FALSE
LOBSTER	17	PMF	460	3514	Stichopus regalis		20	TRUE	TRUE
LOBSTER	17	PMF	463	828	Lophius piscatorius		30	TRUE	FALSE
LOBSTER	17	PMF	463	3515	Stichopus regalis		20	TRUE	TRUE
LOBSTER	17	PMF	464	829	Leucoraja naevus			TRUE	FALSE
LOBSTER	17	PMF	465	830	Calappa granulata		10	TRUE	FALSE
LOBSTER	17	PMF	465	831	Lophius piscatorius			TRUE	FALSE
LOBSTER	17	PMF	466	832	Palinurus elephas		15	FALSE	FALSE
LOBSTER	17	PMF	466	833	Lophius piscatorius			TRUE	FALSE
LOBSTER	17	PMF	466	834	Lophius piscatorius		40	TRUE	FALSE
LOBSTER	17	PMF	466	3516	Stichopus regalis		20	TRUE	TRUE
LOBSTER	17	PMF	467	835	Palinurus elephas		25	FALSE	FALSE
LOBSTER	17	PMF	468	836	Raja clavata		50	TRUE	FALSE
LOBSTER	18	PMF	472	837	Lophius piscatorius			TRUE	FALSE
LOBSTER	18	PMF	472	838	Lophius piscatorius			TRUE	FALSE
LOBSTER	18	PMF	472	3517	Stichopus regalis		20	TRUE	TRUE
LOBSTER	18	PMF	473	839	Raja sp.			TRUE	FALSE
LOBSTER	18	PMF	474	840	Palinurus elephas		5	TRUE	TRUE
LOBSTER	18	PMF	475	841	Palinurus elephas		5	TRUE	TRUE
LOBSTER	18	PMF	475	842	Leucoraja naevus		30	TRUE	TRUE
LOBSTER	18	PMF	476	843	Raja sp.			TRUE	FALSE
LOBSTER	18	PMF	476	844	Raja sp.			TRUE	FALSE
LOBSTER	18	PMF	477	845	Palinurus elephas		5	TRUE	TRUE
LOBSTER	18	PMF	477	846	Palinurus elephas		25	FALSE	FALSE
LOBSTER	18	PMF	478	847	Palinurus elephas		15	FALSE	FALSE
LOBSTER	18	PMF	478	848	Palinurus elephas		25	FALSE	FALSE
LOBSTER	18	PMF	479	849	Lophius piscatorius			TRUE	FALSE
LOBSTER	18	PMF	479	850	Palinurus elephas		25	FALSE	FALSE
LOBSTER	18	MMF	482	3518	Stichopus regalis		20	TRUE	TRUE
LOBSTER	18	MMF	482	851	Raja clavata		40	TRUE	TRUE
LOBSTER	18	MMF	483	852	Raja clavata		15	TRUE	FALSE
LOBSTER	18	MMF	484	853	Raja clavata		50	TRUE	FALSE
LOBSTER	18	MMF	484	854	Scyliorhinus canicula		40	TRUE	FALSE
LOBSTER	18	MMF	484	855	Raja sp.			TRUE	FALSE
LOBSTER	18	MMF	485	856	Raja clavata		50	TRUE	FALSE
LOBSTER	18	MMF	486	857	Scyliorhinus canicula		30	TRUE	FALSE
LOBSTER	18	MMF	486	858	Scyliorhinus canicula		40	TRUE	FALSE
LOBSTER	18	MMF	486	859	Scyliorhinus canicula		40	TRUE	FALSE
LOBSTER	18	MMF	486	860	Raja clavata		20	TRUE	FALSE
LOBSTER	18	MMF	486	861	Lophius piscatorius		40	FALSE	FALSE
LOBSTER	18	MMF	486	862	Palinurus elephas		25	FALSE	FALSE
LOBSTER	18	MMF	486	863	Lophius piscatorius			TRUE	FALSE
LOBSTER	18	MMF	486	864	Palinurus elephas		15	FALSE	FALSE
LOBSTER	18	MMF	487	865	Pagellus erythrinus			TRUE	FALSE
LOBSTER	18	MMF	487	866	Scorpaena scrofa			TRUE	FALSE
LOBSTER	18	MMF	487	867	Pagellus erythrinus			TRUE	FALSE
LOBSTER	18	MMF	488	868	Palinurus elephas		25	FALSE	FALSE
LOBSTER	18	MMF	488	869	Palinurus elephas		15	FALSE	FALSE
LOBSTER	18	MMF	488	870	Lophius piscatorius		40	FALSE	FALSE
LOBSTER	18	MMF	491	871	Raja clavata			TRUE	FALSE
LOBSTER	18	MMF	494	3519	Stichopus regalis		20	TRUE	TRUE
LOBSTER	19	PMF	496	872	Palinurus elephas		15	FALSE	FALSE
LOBSTER	19	MMF	497	873	Leucoraja naevus		30	TRUE	TRUE
LOBSTER	19	MMF	498	874	Palinurus elephas		15	FALSE	FALSE
LOBSTER	19	MMF	499	875	Palinurus elephas		15	FALSE	FALSE
LOBSTER	19	MMF	501	876	Leucoraja naevus		40	TRUE	FALSE
LOBSTER	19	MMF	503	877	Palinurus elephas		15	FALSE	FALSE
LOBSTER	19	MMF	504	878	Raja clavata		30	TRUE	FALSE
LOBSTER	19	MMF	504	879	Palinurus elephas		15	FALSE	FALSE
LOBSTER	19	MMF	504	880	Palinurus elephas		15	FALSE	FALSE
LOBSTER	19	MMF	506	881	Trachinus sp.			TRUE	FALSE
LOBSTER	19	PMF	508	882	Leucoraja naevus		30	TRUE	TRUE
LOBSTER	19	PMF	508	883	Leucoraja naevus		40	TRUE	TRUE
LOBSTER	19	PMF	509	884	Leucoraja naevus		30	TRUE	TRUE
LOBSTER	19	PMF	510	885	Leucoraja naevus		40	TRUE	TRUE
LOBSTER	19	PMF	511	886	Leucoraja naevus		40	TRUE	TRUE
LOBSTER	19	PMF	512	887	Lophius piscatorius		40	FALSE	FALSE
LOBSTER	19	PMF	514	888	Palinurus elephas		15	FALSE	FALSE
LOBSTER	19	PMF	515	3520	Oxynotus centrina	47		TRUE	FALSE
LOBSTER	19	PMF	516	889	Palinurus elephas		15	FALSE	FALSE
LOBSTER	20	PMF	519	890	Lophius piscatorius		40	FALSE	FALSE
LOBSTER	20	PMF	522	891	Palinurus elephas		25	FALSE	FALSE
LOBSTER	20	PMF	523	892	Leucoraja naevus		40	TRUE	TRUE
LOBSTER	20	PMF	523	893	Raja clavata			TRUE	FALSE
LOBSTER	20	PMF	523	894	Leucoraja naevus		30	TRUE	TRUE
LOBSTER	20	PMF	524	895	Palinurus elephas		15	FALSE	FALSE
LOBSTER	20	PMF	524	896	Leucoraja naevus		30	TRUE	FALSE
LOBSTER	20	PMF	524	897	Leucoraja naevus		40	TRUE	FALSE
LOBSTER	20	PMF	524	898	Raja sp.			TRUE	FALSE
LOBSTER	20	PMF	526	899	Raja sp.			TRUE	FALSE
LOBSTER	20	PMF	526	900	Pagellus erythrinus			TRUE	FALSE
LOBSTER	20	PMF	526	901	Palinurus elephas		25	FALSE	FALSE
LOBSTER	20	PMF	526	902	Palinurus elephas			TRUE	FALSE
LOBSTER	20	PMF	527	903	Raja sp.			TRUE	FALSE
LOBSTER	20	PMF	528	904	Raja clavata		30	TRUE	FALSE
LOBSTER	20	PMF	529	905	Raja clavata			TRUE	FALSE
LOBSTER	20	PMF	529	906	Raja clavata			TRUE	FALSE
LOBSTER	20	PMF	529	907	Raja clavata			TRUE	FALSE
LOBSTER	20	PMF	529	908	Leucoraja naevus		40	TRUE	TRUE
LOBSTER	20	PMF	531	909	Raja clavata		50	TRUE	FALSE
LOBSTER	20	PMF	531	910	Scorpaena scrofa		40	FALSE	FALSE
LOBSTER	20	PMF	531	911	Raja sp.			TRUE	FALSE
LOBSTER	20	PMF	531	912	Raja sp.			TRUE	FALSE
LOBSTER	20	PMF	532	913	Raja clavata		40	TRUE	FALSE
LOBSTER	20	PMF	532	914	Raja clavata		40	TRUE	FALSE
LOBSTER	20	PMF	534	915	Raja sp.			TRUE	FALSE
LOBSTER	20	PMF	534	916	Raja sp.			TRUE	FALSE
LOBSTER	20	PMF	535	917	Scorpaena scrofa		40	FALSE	FALSE
LOBSTER	20	PMF	535	918	Synodus saurus			TRUE	FALSE
LOBSTER	20	PMF	536	919	Lophius piscatorius		40	FALSE	FALSE
LOBSTER	20	PMF	536	920	Lophius piscatorius		40	FALSE	FALSE
LOBSTER	20	PMF	536	921	Palinurus elephas		25	FALSE	FALSE
LOBSTER	20	PMF	536	922	Palinurus elephas		25	FALSE	FALSE
LOBSTER	20	PMF	536	923	Scorpaena scrofa			TRUE	FALSE
LOBSTER	20	PMF	538	924	Trigla lyra			TRUE	FALSE
LOBSTER	20	PMF	538	925	Leucoraja naevus		30	TRUE	TRUE
LOBSTER	20	PMF	539	926	Raja sp.			TRUE	FALSE
LOBSTER	20	PMF	539	927	Scorpaena scrofa			TRUE	FALSE
LOBSTER	20	PMF	540	929	Palinurus elephas		25	FALSE	FALSE
LOBSTER	20	PMF	540	930	Palinurus elephas		25	FALSE	FALSE
LOBSTER	20	PMF	540	928	Scorpaena scrofa			TRUE	FALSE
LOBSTER	20	PMF	542	931	Raja sp.			TRUE	FALSE
LOBSTER	20	PMF	542	3521	Stichopus regalis		20	TRUE	TRUE
LOBSTER	20	PMF	542	3522	Raja sp.			TRUE	FALSE
LOBSTER	21	PMF	543	932	Palinurus elephas		25	FALSE	FALSE
LOBSTER	21	PMF	543	933	Raja sp.			TRUE	FALSE
LOBSTER	21	PMF	543	934	Raja clavata		50	TRUE	FALSE
LOBSTER	21	MMF	546	935	Scorpaena scrofa		40	FALSE	FALSE
LOBSTER	21	MMF	546	3523	Calappa granulata		10	TRUE	FALSE
LOBSTER	21	MMF	547	936	Leucoraja naevus		40	TRUE	FALSE
LOBSTER	21	MMF	547	937	Leucoraja naevus		30	TRUE	FALSE
LOBSTER	21	MMF	547	938	Scorpaena scrofa			TRUE	FALSE
LOBSTER	21	MMF	548	939	Raja sp.			TRUE	FALSE
LOBSTER	21	MMF	548	940	Palinurus elephas		25	FALSE	FALSE
LOBSTER	21	MMF	550	941	Raja sp.			TRUE	FALSE
LOBSTER	21	MMF	550	942	Zeus faber			TRUE	FALSE
LOBSTER	21	MMF	551	943	Raja clavata		50	TRUE	FALSE
LOBSTER	21	MMF	551	944	Raja clavata		30	TRUE	FALSE
LOBSTER	21	MMF	552	945	Palinurus elephas		15	FALSE	FALSE
LOBSTER	21	MMF	552	946	Scorpaena scrofa		40	FALSE	FALSE
LOBSTER	21	MMF	552	947	Raja clavata			TRUE	FALSE
LOBSTER	21	MMF	552	3524	Charonia lampas			TRUE	TRUE
LOBSTER	21	MMF	555	948	Palinurus elephas		25	FALSE	FALSE
LOBSTER	21	MMF	555	949	Raja sp.			FALSE	FALSE
LOBSTER	21	MMF	556	950	Raja clavata			TRUE	FALSE
LOBSTER	21	MMF	556	951	Lophius piscatorius		30	FALSE	FALSE
LOBSTER	21	MMF	557	952	Zeus faber			TRUE	FALSE
LOBSTER	21	MMF	559	953	Raja clavata		60	FALSE	FALSE
LOBSTER	21	MMF	560	954	Scorpaena scrofa		40	FALSE	FALSE
LOBSTER	21	MMF	563	955	Scyliorhinus canicula		40	TRUE	FALSE
LOBSTER	21	MMF	563	956	Pagellus erythrinus		20	FALSE	FALSE
LOBSTER	21	MMF	563	957	Raja sp.			TRUE	FALSE
LOBSTER	21	MMF	564	958	Raja sp.		30	TRUE	FALSE
LOBSTER	21	MMF	565	959	Palinurus elephas		25	FALSE	FALSE
LOBSTER	21	MMF	565	960	Trigla lyra			TRUE	FALSE
LOBSTER	21	MMF	565	961	Trigla lyra			TRUE	FALSE
LOBSTER	21	MMF	566	962	Palinurus elephas		15	FALSE	FALSE
LOBSTER	22	MMF	572	963	Raja sp.			TRUE	FALSE
LOBSTER	22	MMF	573	964	Scorpaena scrofa		30	FALSE	FALSE
LOBSTER	22	MMF	573	965	Lophius piscatorius			TRUE	FALSE
LOBSTER	22	MMF	573	966	Lophius piscatorius			TRUE	FALSE
LOBSTER	22	MMF	573	967	Palinurus elephas		15	FALSE	FALSE
LOBSTER	22	MMF	574	968	Trigla lyra		20	FALSE	FALSE
LOBSTER	22	MMF	574	969	Palinurus elephas		15	FALSE	FALSE
LOBSTER	22	MMF	575	970	Raja clavata		20	TRUE	FALSE
LOBSTER	22	MMF	577	971	Scyliorhinus canicula		30	TRUE	FALSE
LOBSTER	22	MMF	577	972	Raja clavata		40	TRUE	FALSE
LOBSTER	22	MMF	579	973	Raja sp.			TRUE	FALSE
LOBSTER	22	MMF	581	974	Squalus acanthias			TRUE	FALSE
LOBSTER	22	MMF	582	975	Raja clavata		40	TRUE	FALSE
LOBSTER	22	MMF	583	976	Raja clavata			TRUE	FALSE
LOBSTER	22	MMF	583	977	Trigla lyra		30	FALSE	FALSE
LOBSTER	22	MMF	583	978	Squalus acanthias			TRUE	FALSE
LOBSTER	22	MMF	584	979	Raja sp.			TRUE	FALSE
LOBSTER	22	MMF	584	980	Trigla lyra			TRUE	FALSE
LOBSTER	22	MMF	585	981	Raja clavata		60	FALSE	FALSE
LOBSTER	22	MMF	585	982	Leucoraja naevus		40	TRUE	TRUE
LOBSTER	22	MMF	585	983	Raja sp.			TRUE	FALSE
LOBSTER	22	MMF	586	984	Scyliorhinus canicula		40	TRUE	FALSE
LOBSTER	22	MMF	586	985	Raja clavata		30	TRUE	FALSE
LOBSTER	22	MMF	586	986	Raja clavata		40	TRUE	FALSE
LOBSTER	22	MMF	586	987	Raja clavata		40	TRUE	FALSE
LOBSTER	22	MMF	587	988	Raja sp.			TRUE	FALSE
LOBSTER	22	MMF	587	989	Raja sp.			TRUE	FALSE
LOBSTER	22	MMF	587	990	Raja clavata		30	TRUE	FALSE
LOBSTER	22	MMF	587	991	Raja clavata		40	TRUE	FALSE
LOBSTER	22	MMF	588	992	Raja sp.			TRUE	FALSE
LOBSTER	22	MMF	589	993	Trigla lyra			TRUE	FALSE
LOBSTER	22	MMF	589	994	Raja sp.			TRUE	FALSE
LOBSTER	22	MMF	591	995	Trachinus sp.		15	TRUE	FALSE
LOBSTER	22	MMF	591	996	Raja clavata			TRUE	FALSE
LOBSTER	22	MMF	593	997	Raja sp.			TRUE	FALSE
LOBSTER	23	PMF	597	998	Palinurus elephas		15	FALSE	FALSE
LOBSTER	23	PMF	598	999	Zeus faber			TRUE	FALSE
LOBSTER	23	PMF	602	1000	Calappa granulata		10	TRUE	TRUE
LOBSTER	23	PMF	606	1001	Scyliorhinus canicula		40	TRUE	FALSE
LOBSTER	23	PMF	607	1002	Leucoraja naevus			TRUE	FALSE
LOBSTER	23	PMF	608	1003	Raja clavata		30	TRUE	FALSE
LOBSTER	23	PMF	609	1004	Raja sp.			TRUE	FALSE
LOBSTER	23	PMF	610	1005	Leucoraja naevus		40	TRUE	TRUE
LOBSTER	23	PMF	611	1006	Torpedo marmorata			TRUE	FALSE
LOBSTER	23	PMF	611	1007	Palinurus elephas		15	FALSE	FALSE
LOBSTER	23	PMF	613	1008	Palinurus elephas		5	TRUE	TRUE
LOBSTER	23	PMF	613	1009	Palinurus elephas		15	FALSE	FALSE
LOBSTER	23	PMF	613	1010	Palinurus elephas		25	FALSE	FALSE
LOBSTER	23	PMF	614	1011	Palinurus elephas		15	FALSE	FALSE
LOBSTER	23	PMF	614	1012	Raja sp.			TRUE	FALSE
LOBSTER	23	PMF	614	1013	Peristedion cataphractum			TRUE	FALSE
LOBSTER	23	PMF	616	1014	Raja clavata		40	TRUE	FALSE
LOBSTER	23	PMF	617	1015	Leucoraja naevus		30	TRUE	FALSE
LOBSTER	23	PMF	617	1016	Palinurus elephas		15	FALSE	FALSE
LOBSTER	23	PMF	618	1017	Raja sp.			TRUE	FALSE
LOBSTER	23	PMF	618	1018	Raja sp.			TRUE	FALSE
LOBSTER	23	PMF	619	1019	Raja clavata		40	TRUE	FALSE
LOBSTER	23	PMF	619	1020	Palinurus elephas		15	FALSE	FALSE
LOBSTER	23	PMF	620	1021	Trigla lyra			TRUE	FALSE
LOBSTER	23	PMF	621	1022	Raja sp.			TRUE	FALSE
LOBSTER	23	PMF	621	1023	Raja sp.			TRUE	FALSE
LOBSTER	23	PMF	622	1024	Palinurus elephas		5	TRUE	TRUE
LOBSTER	23	PMF	622	1025	Raja clavata		40	TRUE	FALSE
LOBSTER	24	MMF	626	1026	Leucoraja naevus			TRUE	FALSE
LOBSTER	24	MMF	630	1027	Scorpaena scrofa			TRUE	FALSE
LOBSTER	24	MMF	631	1028	Pagrus pagrus			TRUE	FALSE
LOBSTER	24	MMF	631	1029	Palinurus elephas			TRUE	FALSE
LOBSTER	24	MMF	631	1030	Scorpaena scrofa			TRUE	FALSE
LOBSTER	24	MMF	631	1031	Palinurus elephas		25	FALSE	FALSE
LOBSTER	24	MMF	632	1032	Scorpaena scrofa			TRUE	FALSE
LOBSTER	24	MMF	634	1033	Thunnus sp.			TRUE	FALSE
LOBSTER	24	MMF	634	1034	Raja sp.			TRUE	FALSE
LOBSTER	24	MMF	634	1035	Lophius piscatorius			TRUE	FALSE
LOBSTER	24	MMF	635	1036	Raja sp.			TRUE	FALSE
LOBSTER	24	MMF	635	1037	Lophius piscatorius			TRUE	FALSE
LOBSTER	24	MMF	636	1038	Palinurus elephas		15	FALSE	FALSE
LOBSTER	24	MMF	636	1039	Scorpaena scrofa			TRUE	FALSE
LOBSTER	24	MMF	636	1040	Raja sp.			TRUE	FALSE
LOBSTER	24	MMF	639	1041	Palinurus elephas		15	FALSE	FALSE
LOBSTER	24	MMF	639	1042	Leucoraja naevus		30	TRUE	FALSE
LOBSTER	24	MMF	639	1043	Scorpaena scrofa			TRUE	FALSE
LOBSTER	24	MMF	642	1044	Raja sp.			TRUE	FALSE
LOBSTER	24	MMF	642	1045	Raja sp.			TRUE	FALSE
LOBSTER	24	MMF	642	1046	Raja sp.			TRUE	FALSE
LOBSTER	25	MMF	647	1047	Scyliorhinus canicula		40	TRUE	FALSE
LOBSTER	25	MMF	647	1048	Trigla lyra		20	TRUE	FALSE
LOBSTER	25	MMF	648	1049	Leucoraja naevus			TRUE	FALSE
LOBSTER	25	MMF	653	1050	ND			TRUE	FALSE
LOBSTER	25	MMF	654	1051	Palinurus elephas		15	FALSE	FALSE
LOBSTER	25	MMF	656	1052	Scorpaena scrofa			TRUE	FALSE
LOBSTER	25	MMF	657	1053	Leucoraja naevus			TRUE	FALSE
LOBSTER	25	MMF	662	1054	Scorpaena scrofa			TRUE	FALSE
LOBSTER	25	MMF	662	1055	Scorpaena scrofa			TRUE	FALSE
LOBSTER	25	MMF	663	1056	Scorpaena scrofa			TRUE	FALSE
LOBSTER	25	PMF	667	1057	Raja sp.			TRUE	FALSE
LOBSTER	25	PMF	667	1058	Raja clavata			TRUE	FALSE
LOBSTER	26	PMF	668	1059	Palinurus elephas		15	FALSE	FALSE
LOBSTER	26	PMF	668	1060	Palinurus elephas			TRUE	FALSE
LOBSTER	26	PMF	669	1061	Palinurus elephas		15	FALSE	FALSE
LOBSTER	26	PMF	669	1062	Leucoraja naevus		40	TRUE	TRUE
LOBSTER	26	PMF	669	1063	Leucoraja naevus			TRUE	FALSE
LOBSTER	26	PMF	669	1064	Palinurus elephas		25	FALSE	FALSE
LOBSTER	26	PMF	671	1065	Raja sp.			TRUE	FALSE
LOBSTER	26	PMF	672	1066	Palinurus elephas		15	FALSE	FALSE
LOBSTER	26	PMF	672	1067	Scyliorhinus canicula			TRUE	FALSE
LOBSTER	26	PMF	672	1068	Palinurus elephas		25	FALSE	FALSE
LOBSTER	26	PMF	672	1069	Leucoraja naevus			TRUE	FALSE
LOBSTER	26	PMF	672	1070	Leucoraja naevus			TRUE	FALSE
LOBSTER	26	PMF	672	1071	Palinurus elephas		15	FALSE	FALSE
LOBSTER	26	PMF	672	1072	Raja clavata			TRUE	FALSE
LOBSTER	26	PMF	672	1073	Raja clavata			TRUE	FALSE
LOBSTER	26	PMF	673	1074	Leucoraja naevus			TRUE	FALSE
LOBSTER	26	PMF	673	1075	Leucoraja naevus			TRUE	FALSE
LOBSTER	26	PMF	673	1076	Lophius piscatorius			TRUE	FALSE
LOBSTER	26	PMF	673	1077	Leucoraja naevus			TRUE	FALSE
LOBSTER	26	PMF	673	1078	Palinurus elephas		15	FALSE	FALSE
LOBSTER	26	PMF	675	1079	Raja sp.			TRUE	FALSE
LOBSTER	26	PMF	676	1080	Raja sp.			TRUE	FALSE
LOBSTER	26	PMF	676	1081	Palinurus elephas		15	FALSE	FALSE
LOBSTER	26	PMF	676	1082	Raja clavata			TRUE	FALSE
LOBSTER	26	PMF	676	1083	Palinurus elephas		25	FALSE	FALSE
LOBSTER	26	PMF	677	1084	Scorpaena scrofa			TRUE	FALSE
LOBSTER	26	PMF	677	1085	Raja clavata		40	TRUE	FALSE
LOBSTER	26	PMF	678	1086	Palinurus elephas		15	FALSE	FALSE
LOBSTER	26	PMF	678	1087	Palinurus elephas		25	FALSE	FALSE
LOBSTER	26	PMF	681	1088	Leucoraja naevus			TRUE	FALSE
LOBSTER	26	PMF	682	1089	Palinurus elephas		15	FALSE	FALSE
LOBSTER	26	PMF	684	1090	Palinurus elephas		15	FALSE	FALSE
LOBSTER	26	PMF	685	1091	Palinurus elephas		15	FALSE	FALSE
LOBSTER	26	PMF	685	1092	Palinurus elephas		25	FALSE	FALSE
LOBSTER	26	PMF	686	1093	Palinurus elephas		15	FALSE	FALSE
LOBSTER	26	PMF	687	1094	Lophius piscatorius		40	FALSE	FALSE
LOBSTER	26	PMF	688	1095	Palinurus elephas		15	FALSE	FALSE
LOBSTER	26	PMF	689	1096	Palinurus elephas		15	FALSE	FALSE
LOBSTER	26	PMF	689	1097	Raja clavata			TRUE	FALSE
LOBSTER	26	PMF	690	1100	Palinurus elephas		15	FALSE	FALSE
LOBSTER	26	PMF	692	1102	Palinurus elephas		25	FALSE	FALSE
LOBSTER	27	PMF	697	1103	Palinurus elephas			TRUE	FALSE
LOBSTER	27	PMF	697	1104	Palinurus elephas		15	FALSE	FALSE
LOBSTER	27	PMF	698	1105	Palinurus elephas		15	FALSE	FALSE
LOBSTER	27	PMF	698	1106	Palinurus elephas		25	FALSE	FALSE
LOBSTER	27	PMF	701	1107	Palinurus elephas		15	FALSE	FALSE
LOBSTER	27	PMF	703	1108	Zeus faber		40	FALSE	FALSE
LOBSTER	27	PMF	703	1109	Labrus bimaculatus			TRUE	FALSE
LOBSTER	27	PMF	705	1110	Palinurus elephas		15	FALSE	FALSE
LOBSTER	27	PMF	706	1111	Aulopus filamentosus		30	TRUE	FALSE
LOBSTER	27	PMF	710	1112	Scyliorhinus canicula		50	TRUE	FALSE
LOBSTER	27	PMF	710	1113	Phycis sp.			TRUE	FALSE
LOBSTER	27	PMF	711	1114	Serranus cabrilla		20	FALSE	FALSE
LOBSTER	27	PMF	711	1115	Palinurus elephas		15	FALSE	FALSE
LOBSTER	27	PMF	711	1116	Palinurus elephas		25	FALSE	FALSE
LOBSTER	27	PMF	711	1117	Palinurus elephas		15	FALSE	FALSE
LOBSTER	27	PMF	714	1118	Palinurus elephas		15	FALSE	FALSE
LOBSTER	27	PMF	714	1119	Palinurus elephas			TRUE	FALSE
LOBSTER	27	PMF	714	1120	Labrus bimaculatus		30	TRUE	FALSE
LOBSTER	27	PMF	715	1121	Scorpaena scrofa		40	FALSE	FALSE
LOBSTER	27	PMF	715	1122	Palinurus elephas		15	FALSE	FALSE
LOBSTER	27	PMF	717	1123	Raja sp.			TRUE	FALSE
LOBSTER	27	PMF	722	1124	Palinurus elephas		15	FALSE	FALSE
LOBSTER	28	PMF	725	1125	Palinurus elephas		15	FALSE	FALSE
LOBSTER	28	PMF	725	1126	Aulopus filamentosus			TRUE	FALSE
LOBSTER	28	PMF	726	1127	Aulopus filamentosus		30	TRUE	FALSE
LOBSTER	28	PMF	727	1128	Palinurus elephas		25	FALSE	FALSE
LOBSTER	28	PMF	730	1129	Aulopus filamentosus		30	TRUE	FALSE
LOBSTER	28	PMF	731	1130	Palinurus elephas		15	FALSE	FALSE
LOBSTER	28	PMF	731	1131	Leucoraja naevus		40	TRUE	TRUE
LOBSTER	28	PMF	733	1132	Palinurus elephas		15	FALSE	FALSE
LOBSTER	28	PMF	733	1133	Palinurus elephas			TRUE	FALSE
LOBSTER	28	PMF	743	1134	Palinurus elephas		25	FALSE	FALSE
LOBSTER	28	PMF	744	1135	Palinurus elephas		15	FALSE	FALSE
LOBSTER	28	PMF	744	1136	Palinurus elephas		25	FALSE	FALSE
LOBSTER	28	PMF	745	1137	Scorpaena scrofa			TRUE	FALSE
LOBSTER	28	PMF	745	1138	Zeus faber			TRUE	FALSE
LOBSTER	28	PMF	745	1139	Palinurus elephas		15	FALSE	FALSE
LOBSTER	60	PMF	1419	2230	Leucoraja naevus		30	TRUE	FALSE
LOBSTER	60	PMF	1419	2231	Leucoraja naevus		30	TRUE	FALSE
LOBSTER	60	MMF	1423	2232	Leucoraja naevus		40	TRUE	FALSE
LOBSTER	60	MMF	1423	2233	Raja clavata		50	FALSE	FALSE
LOBSTER	60	MMF	1423	2234	Raja clavata		50	FALSE	FALSE
LOBSTER	60	MMF	1424	2235	Leucoraja naevus		40	TRUE	FALSE
LOBSTER	60	MMF	1424	2236	Leucoraja naevus		40	TRUE	TRUE
LOBSTER	60	MMF	1425	2237	Leucoraja naevus		40	TRUE	FALSE
LOBSTER	60	MMF	1425	2238	Leucoraja naevus		40	TRUE	TRUE
LOBSTER	60	MMF	1425	2239	Leucoraja naevus		40	TRUE	TRUE
LOBSTER	60	MMF	1425	2240	Leucoraja naevus		40	TRUE	FALSE
LOBSTER	60	MMF	1425	2241	Leucoraja naevus		40	TRUE	TRUE
LOBSTER	60	MMF	1427	2242	Leucoraja naevus		40	TRUE	TRUE
LOBSTER	60	MMF	1427	2243	Leucoraja naevus		40	TRUE	TRUE
LOBSTER	60	MMF	1428	2244	Leucoraja naevus		40	TRUE	TRUE
LOBSTER	60	MMF	1428	2245	Leucoraja naevus		40	TRUE	TRUE
LOBSTER	60	MMF	1429	2246	Leucoraja naevus		40	TRUE	FALSE
LOBSTER	60	MMF	1429	2247	Leucoraja naevus		40	TRUE	TRUE
LOBSTER	60	MMF	1429	2248	Raja clavata		70	FALSE	FALSE
LOBSTER	60	MMF	1431	2249	Leucoraja naevus		30	TRUE	TRUE
LOBSTER	60	MMF	1433	2250	Raja clavata		50	FALSE	FALSE
LOBSTER	60	MMF	1433	2251	Raja clavata		50	TRUE	FALSE
LOBSTER	60	MMF	1433	2252	Leucoraja naevus		40	TRUE	TRUE
LOBSTER	60	MMF	1433	2253	Leucoraja naevus		40	TRUE	FALSE
LOBSTER	60	MMF	1433	2254	Leucoraja naevus		30	TRUE	TRUE
LOBSTER	60	MMF	1433	2255	Leucoraja naevus		40	TRUE	TRUE
LOBSTER	60	MMF	1433	2256	Leucoraja naevus		40	TRUE	TRUE
LOBSTER	60	MMF	1433	2257	Leucoraja naevus		30	TRUE	TRUE
LOBSTER	60	MMF	1433	2258	Leucoraja naevus		30	TRUE	FALSE
LOBSTER	60	MMF	1433	2259	Leucoraja naevus		30	TRUE	FALSE
LOBSTER	60	MMF	1433	2260	Peristedion cataphractum		20	TRUE	FALSE
LOBSTER	60	MMF	1434	2261	Scorpaena scrofa		18	TRUE	TRUE
LOBSTER	60	MMF	1434	2262	Leucoraja naevus		40	TRUE	TRUE
LOBSTER	60	MMF	1434	2263	Leucoraja naevus		40	TRUE	FALSE
LOBSTER	60	MMF	1436	2264	Leucoraja naevus		30	TRUE	TRUE
LOBSTER	60	MMF	1436	2265	Leucoraja naevus		30	TRUE	TRUE
LOBSTER	60	MMF	1436	2266	Leucoraja naevus		40	TRUE	FALSE
LOBSTER	60	MMF	1436	2267	Raja clavata		60	FALSE	FALSE
LOBSTER	60	MMF	1436	2268	Leucoraja naevus		30	TRUE	TRUE
LOBSTER	60	MMF	1436	2269	Leucoraja naevus		40	TRUE	TRUE
LOBSTER	60	MMF	1436	2270	Raja clavata		60	FALSE	FALSE
LOBSTER	60	MMF	1437	2271	Leucoraja naevus		30	TRUE	TRUE
LOBSTER	60	MMF	1437	2272	Leucoraja naevus		30	TRUE	FALSE
LOBSTER	60	MMF	1437	2273	Leucoraja naevus		30	TRUE	TRUE
LOBSTER	60	MMF	1438	2274	Leucoraja naevus		30	TRUE	TRUE
LOBSTER	60	MMF	1439	2275	Leucoraja naevus		40	TRUE	TRUE
LOBSTER	60	MMF	1440	2276	Leucoraja naevus		30	TRUE	FALSE
LOBSTER	60	MMF	1440	2277	Leucoraja naevus		30	TRUE	TRUE
LOBSTER	60	MMF	1440	2278	Trigla lyra		30	FALSE	FALSE
LOBSTER	60	MMF	1440	2279	Leucoraja naevus		30	TRUE	TRUE
LOBSTER	61	PMF	1443	2281	Palinurus elephas		25	FALSE	FALSE
LOBSTER	61	PMF	1443	2282	Scorpaena scrofa		40	FALSE	FALSE
LOBSTER	61	PMF	1444	2283	Leucoraja naevus		30	TRUE	TRUE
LOBSTER	61	PMF	1444	2284	Raja clavata		30	FALSE	FALSE
LOBSTER	61	PMF	1445	2285	Raja clavata			TRUE	FALSE
LOBSTER	61	PMF	1448	2287	Palinurus elephas		15	FALSE	FALSE
LOBSTER	61	PMF	1449	2288	Leucoraja naevus		30	TRUE	TRUE
LOBSTER	61	PMF	1450	2289	Torpedo marmorata		45	TRUE	TRUE
LOBSTER	61	PMF	1450	2290	Palinurus elephas		15	FALSE	FALSE
LOBSTER	61	PMF	1450	2291	Palinurus elephas		15	FALSE	FALSE
LOBSTER	61	PMF	1452	2292	Leucoraja naevus		30	TRUE	FALSE
LOBSTER	61	PMF	1455	2293	Leucoraja naevus		30	TRUE	TRUE
LOBSTER	61	PMF	1455	2294	Palinurus elephas		5	TRUE	TRUE
LOBSTER	61	PMF	1456	2295	Lophius piscatorius			TRUE	FALSE
LOBSTER	61	PMF	1457	2296	Palinurus elephas		5	TRUE	TRUE
LOBSTER	61	PMF	1457	2297	Leucoraja naevus		30	TRUE	FALSE
LOBSTER	61	PMF	1457	2298	Raja clavata		50	FALSE	FALSE
LOBSTER	61	PMF	1457	2299	Palinurus elephas		15	FALSE	FALSE
LOBSTER	61	PMF	1458	2300	Leucoraja naevus		30	TRUE	TRUE
LOBSTER	61	PMF	1461	2301	Leucoraja naevus		30	TRUE	TRUE
LOBSTER	61	PMF	1465	2302	Leucoraja naevus		30	TRUE	TRUE
LOBSTER	64	PMF	1515	2432	Palinurus elephas		15	FALSE	FALSE
LOBSTER	64	MMF	1517	2433	Lophius piscatorius		20	FALSE	FALSE
LOBSTER	64	MMF	1517	2434	Scorpaena scrofa		40	FALSE	FALSE
LOBSTER	64	MMF	1517	2435	Scorpaena scrofa		10	TRUE	FALSE
LOBSTER	64	MMF	1518	2436	Lophius piscatorius		30	FALSE	FALSE
LOBSTER	64	MMF	1520	2437	Scyliorhinus canicula	40		TRUE	FALSE
LOBSTER	64	MMF	1521	2438	Scorpaena scrofa	41		TRUE	FALSE
LOBSTER	64	MMF	1522	2439	Raja clavata	70		TRUE	FALSE
LOBSTER	64	MMF	1523	2440	Raja clavata		40	TRUE	FALSE
LOBSTER	64	MMF	1523	2441	Scorpaena scrofa		30	FALSE	FALSE
LOBSTER	64	MMF	1524	2448	Holoturia sp.		20	TRUE	TRUE
LOBSTER	64	MMF	1524	2442	Raja miraletus		40	TRUE	FALSE
LOBSTER	64	MMF	1524	2443	Torpedo marmorata		40	TRUE	FALSE
LOBSTER	64	MMF	1524	2444	Lophius piscatorius		40	FALSE	FALSE
LOBSTER	64	MMF	1527	2445	Lophius piscatorius		40	TRUE	FALSE
LOBSTER	64	MMF	1527	2446	Leucoraja naevus	48		TRUE	TRUE
LOBSTER	64	MMF	1527	2447	Holoturia sp.		20	TRUE	TRUE
LOBSTER	64	MMF	1529	2449	Raja clavata		10	TRUE	FALSE
LOBSTER	64	MMF	1534	2450	Leucoraja naevus	50		TRUE	FALSE
LOBSTER	64	PMF	1535	2451	Scorpaena scrofa		30	FALSE	FALSE
LOBSTER	64	PMF	1535	2452	Scyliorhinus canicula	45		TRUE	FALSE
LOBSTER	64	PMF	1535	2453	Scyliorhinus canicula	42.5		TRUE	FALSE
LOBSTER	64	PMF	1535	2454	Scyliorhinus canicula	42		TRUE	FALSE
LOBSTER	64	PMF	1535	2455	Scyliorhinus canicula	36.5		TRUE	FALSE
LOBSTER	65	PMF	1553	2457	Raja clavata		30	TRUE	FALSE
LOBSTER	65	PMF	1553	2458	Raja clavata		30	TRUE	FALSE
LOBSTER	65	PMF	1559	2459	Calappa granulata		10	TRUE	FALSE
LOBSTER	66	MMF	1562	2461	Calappa granulata		10	FALSE	FALSE
LOBSTER	66	MMF	1562	2462	Palinurus elephas		15	FALSE	FALSE
LOBSTER	66	MMF	1562	2463	Palinurus elephas	8		TRUE	TRUE
LOBSTER	66	MMF	1562	2464	Palinurus elephas		15	FALSE	FALSE
LOBSTER	66	MMF	1562	2465	Palinurus elephas		25	FALSE	FALSE
LOBSTER	66	MMF	1563	2466	Palinurus elephas	8		TRUE	TRUE
LOBSTER	66	MMF	1564	2467	Palinurus elephas		15	FALSE	FALSE
LOBSTER	66	MMF	1564	2468	Palinurus elephas		25	FALSE	FALSE
LOBSTER	66	MMF	1565	2469	Palinurus elephas		15	FALSE	FALSE
LOBSTER	66	MMF	1565	2470	Palinurus elephas		15	FALSE	FALSE
LOBSTER	66	MMF	1566	2471	Palinurus elephas		15	TRUE	FALSE
LOBSTER	66	MMF	1566	2472	Lophius piscatorius			TRUE	FALSE
LOBSTER	66	MMF	1566	2473	Scyliorhinus canicula	35		TRUE	FALSE
LOBSTER	66	MMF	1566	2474	Raja clavata	65		FALSE	FALSE
LOBSTER	66	MMF	1567	2475	Leucoraja naevus	45		TRUE	TRUE
LOBSTER	66	MMF	1568	2476	Calappa granulata		10	FALSE	FALSE
LOBSTER	66	MMF	1568	2477	Peristedion cataphractum	25		TRUE	FALSE
LOBSTER	66	MMF	1570	2478	Leucoraja naevus	42		TRUE	TRUE
LOBSTER	66	MMF	1570	2479	Scorpaena scrofa		30	FALSE	FALSE
LOBSTER	66	MMF	1573	2480	Lophius piscatorius	60		TRUE	FALSE
LOBSTER	66	MMF	1573	2481	Leucoraja naevus	45		TRUE	TRUE
LOBSTER	66	MMF	1573	2482	Scorpaena scrofa		30	FALSE	FALSE
LOBSTER	66	MMF	1574	2483	Palinurus elephas		15	FALSE	FALSE
LOBSTER	66	MMF	1574	2484	Leucoraja naevus	47		TRUE	TRUE
LOBSTER	66	MMF	1582	2485	Peristedion cataphractum	25		TRUE	FALSE
LOBSTER	66	PMF	1584	2486	Palinurus elephas		15	FALSE	FALSE
LOBSTER	67	PMF	1586	2487	Leucoraja naevus	43		TRUE	TRUE
LOBSTER	67	PMF	1586	2488	Leucoraja naevus	42		TRUE	FALSE
LOBSTER	67	PMF	1587	2489	Palinurus elephas	8		TRUE	TRUE
LOBSTER	67	PMF	1588	2490	Scorpaena scrofa		30	FALSE	FALSE
LOBSTER	67	PMF	1590	2491	Palinurus elephas		15	FALSE	FALSE
LOBSTER	67	PMF	1590	2492	Palinurus elephas		15	FALSE	FALSE
LOBSTER	67	PMF	1592	2493	Leucoraja naevus	41		TRUE	FALSE
LOBSTER	67	PMF	1592	2494	Palinurus elephas		15	FALSE	FALSE
LOBSTER	67	PMF	1592	2495	Leucoraja naevus	43		TRUE	TRUE
LOBSTER	67	PMF	1592	2496	Pagellus erythrinus	18		FALSE	FALSE
LOBSTER	67	PMF	1593	2497	Scorpaena scrofa		30	FALSE	FALSE
LOBSTER	67	PMF	1593	2498	Scorpaena scrofa		40	FALSE	FALSE
LOBSTER	67	PMF	1596	2499	Leucoraja naevus	40		TRUE	TRUE
LOBSTER	67	PMF	1596	2500	Leucoraja naevus	41		TRUE	FALSE
LOBSTER	67	PMF	1596	2501	Scyliorhinus canicula	38		TRUE	FALSE
LOBSTER	67	PMF	1596	2502	Leucoraja naevus	40		TRUE	TRUE
LOBSTER	67	PMF	1596	2503	Raja miraletus	32		TRUE	TRUE
LOBSTER	67	PMF	1596	2504	Raja clavata	45		TRUE	FALSE
LOBSTER	67	PMF	1596	2505	Leucoraja naevus	40		TRUE	FALSE
LOBSTER	67	PMF	1596	2506	Leucoraja naevus	42		TRUE	TRUE
LOBSTER	67	PMF	1599	2507	Raja clavata	50		TRUE	FALSE
LOBSTER	67	PMF	1599	2508	Palinurus elephas		25	FALSE	FALSE
LOBSTER	67	PMF	1599	2509	Leucoraja naevus	42		TRUE	TRUE
LOBSTER	67	PMF	1599	2510	Leucoraja naevus	42		TRUE	TRUE
LOBSTER	67	PMF	1599	2511	Leucoraja naevus	37		TRUE	TRUE
LOBSTER	67	PMF	1600	2512	Leucoraja naevus	39		TRUE	TRUE
LOBSTER	67	PMF	1601	2513	Leucoraja naevus	43		TRUE	TRUE
LOBSTER	67	PMF	1601	2514	Leucoraja naevus	41		TRUE	TRUE
LOBSTER	67	PMF	1602	2515	Leucoraja naevus	42		TRUE	TRUE
LOBSTER	67	PMF	1603	2516	Scyliorhinus canicula	46		TRUE	FALSE
LOBSTER	67	PMF	1606	2517	Leucoraja naevus	40		TRUE	TRUE
LOBSTER	67	PMF	1606	2518	Leucoraja naevus	39		TRUE	TRUE
LOBSTER	67	PMF	1606	2519	Lophius piscatorius		65	FALSE	FALSE
LOBSTER	67	PMF	1607	2520	Raja miraletus	30		TRUE	TRUE
LOBSTER	67	PMF	1607	2521	Leucoraja naevus	50		TRUE	TRUE
LOBSTER	67	PMF	1610	2522	Palinurus elephas		15	FALSE	FALSE
LOBSTER	67	PMF	1610	2523	Raja clavata	50		TRUE	FALSE
LOBSTER	70	PMF	1676	2643	Raja clavata		40	TRUE	TRUE
LOBSTER	70	PMF	1677	2644	Leucoraja naevus		30	TRUE	TRUE
LOBSTER	70	PMF	1677	2645	Leucoraja naevus		40	TRUE	TRUE
LOBSTER	70	PMF	1678	2646	Pagellus acarne		20	FALSE	FALSE
LOBSTER	70	PMF	1678	2647	Phycis sp.		30	FALSE	FALSE
LOBSTER	70	PMF	1678	2648	Palinurus elephas		15	FALSE	FALSE
LOBSTER	70	PMF	1678	2649	Argentina sphyraena		15	TRUE	FALSE
LOBSTER	70	PMF	1678	2650	Palinurus elephas		15	FALSE	FALSE
LOBSTER	70	PMF	1678	2651	Calappa granulata		10	FALSE	FALSE
LOBSTER	70	PMF	1681	2652	Raja clavata		60	TRUE	FALSE
LOBSTER	70	PMF	1681	2653	Leucoraja naevus		30	TRUE	TRUE
LOBSTER	70	PMF	1682	2654	Raja clavata		40	TRUE	TRUE
LOBSTER	70	PMF	1682	2655	Raja clavata		40	TRUE	TRUE
LOBSTER	70	PMF	1682	2656	Raja clavata		60	TRUE	FALSE
LOBSTER	70	PMF	1682	2657	Palinurus elephas		15	FALSE	FALSE
LOBSTER	70	MMF	1673	2638	Palinurus elephas		15	FALSE	FALSE
LOBSTER	70	MMF	1673	2639	Leucoraja naevus		60	TRUE	TRUE
LOBSTER	70	MMF	1674	2640	Leucoraja naevus		60	TRUE	TRUE
LOBSTER	70	MMF	1675	2641	Zeus faber		50	TRUE	FALSE
LOBSTER	70	MMF	1675	2642	Charonia lampas	15		TRUE	TRUE
LOBSTER	70	PMF	1659	2607	Leucoraja naevus			TRUE	FALSE
LOBSTER	70	MMF	1661	2608	Leucoraja naevus			TRUE	FALSE
LOBSTER	70	MMF	1661	2609	Scorpaena scrofa		30	FALSE	FALSE
LOBSTER	70	MMF	1661	2610	Palinurus elephas		15	FALSE	FALSE
LOBSTER	70	MMF	1661	2611	Scorpaena scrofa		40	FALSE	FALSE
LOBSTER	70	MMF	1661	2612	Raja sp.			TRUE	FALSE
LOBSTER	70	MMF	1661	2613	Raja sp.			TRUE	FALSE
LOBSTER	70	MMF	1662	2614	Peristedion cataphractum		20	TRUE	FALSE
LOBSTER	70	MMF	1663	2615	Peristedion cataphractum			TRUE	FALSE
LOBSTER	70	MMF	1663	2616	Raja clavata		30	TRUE	TRUE
LOBSTER	70	MMF	1663	2617	Peristedion cataphractum		20	TRUE	FALSE
LOBSTER	70	MMF	1664	2618	Phycis sp.		30	FALSE	FALSE
LOBSTER	70	MMF	1664	2619	Peristedion cataphractum		20	FALSE	FALSE
LOBSTER	70	MMF	1664	2620	Leucoraja naevus		40	TRUE	TRUE
LOBSTER	70	MMF	1666	2621	Raja sp.			TRUE	FALSE
LOBSTER	70	MMF	1666	2622	Leucoraja naevus		40	TRUE	TRUE
LOBSTER	70	MMF	1666	2623	Peristedion cataphractum		20	FALSE	FALSE
LOBSTER	70	MMF	1668	2624	Leucoraja naevus		30	TRUE	TRUE
LOBSTER	70	MMF	1669	2625	Palinurus elephas		15	FALSE	FALSE
LOBSTER	70	MMF	1669	2626	Palinurus elephas		15	FALSE	FALSE
LOBSTER	70	MMF	1669	2627	Leucoraja naevus		30	TRUE	TRUE
LOBSTER	70	MMF	1670	2628	Oxynotus centrina		60	TRUE	TRUE
LOBSTER	70	MMF	1671	2629	Leucoraja naevus		40	TRUE	TRUE
LOBSTER	70	MMF	1671	2630	Phycis sp.		30	TRUE	FALSE
LOBSTER	70	MMF	1671	2631	Palinurus elephas		15	FALSE	FALSE
LOBSTER	70	MMF	1671	2632	Leucoraja naevus		40	TRUE	TRUE
LOBSTER	70	MMF	1671	2633	Leucoraja naevus		40	TRUE	TRUE
LOBSTER	70	MMF	1671	2634	Argentina sphyraena		30	TRUE	FALSE
LOBSTER	70	MMF	1671	2635	Scorpaena scrofa		40	FALSE	FALSE
LOBSTER	70	MMF	1672	2636	Argentina sphyraena			TRUE	FALSE
LOBSTER	70	MMF	1672	2637	Zeus faber		30	TRUE	FALSE
LOBSTER	71	PMF	1685	2658	Palinurus elephas		5	TRUE	TRUE
LOBSTER	71	PMF	1685	2659	Palinurus elephas			TRUE	FALSE
LOBSTER	71	PMF	1685	2660	Raja clavata		50	FALSE	FALSE
LOBSTER	71	PMF	1685	2661	Palinurus elephas		5	TRUE	TRUE
LOBSTER	71	PMF	1685	2662	Palinurus elephas		5	TRUE	TRUE
LOBSTER	71	PMF	1685	2663	Palinurus elephas		25	TRUE	FALSE
LOBSTER	71	PMF	1685	2664	Palinurus elephas		5	TRUE	FALSE
LOBSTER	71	PMF	1685	2665	Palinurus elephas		5	TRUE	TRUE
LOBSTER	71	PMF	1685	2666	Palinurus elephas		25	TRUE	FALSE
LOBSTER	71	PMF	1685	2667	Scorpaena scrofa		30	TRUE	FALSE
LOBSTER	71	PMF	1685	2668	Palinurus elephas		5	TRUE	FALSE
LOBSTER	71	PMF	1686	2669	Palinurus elephas		5	TRUE	TRUE
LOBSTER	71	PMF	1686	2670	Palinurus elephas		5	TRUE	TRUE
LOBSTER	71	PMF	1686	2671	Lophius piscatorius		40	FALSE	FALSE
LOBSTER	71	PMF	1687	2672	Palinurus elephas		5	TRUE	TRUE
LOBSTER	71	PMF	1688	2673	Palinurus elephas		5	TRUE	TRUE
LOBSTER	71	PMF	1689	2674	Palinurus elephas		5	TRUE	TRUE
LOBSTER	71	PMF	1689	2675	Leucoraja naevus		40	TRUE	TRUE
LOBSTER	71	PMF	1689	2676	Palinurus elephas		5	TRUE	TRUE
LOBSTER	71	PMF	1691	2677	Palinurus elephas		25	FALSE	FALSE
LOBSTER	71	PMF	1691	2678	Palinurus elephas		5	TRUE	TRUE
LOBSTER	71	MMF	1692	2679	Palinurus elephas		5	TRUE	FALSE
LOBSTER	71	MMF	1692	2680	Palinurus elephas		5	TRUE	TRUE
LOBSTER	71	MMF	1692	2681	Lophius piscatorius			TRUE	FALSE
LOBSTER	71	MMF	1694	2682	Raja clavata			TRUE	FALSE
LOBSTER	71	MMF	1695	2683	Lophius piscatorius		50	TRUE	FALSE
LOBSTER	71	MMF	1697	2684	Peristedion cataphractum		20	FALSE	FALSE
LOBSTER	71	MMF	1697	2685	Palinurus elephas		15	FALSE	FALSE
LOBSTER	71	MMF	1698	2687	Scorpaena scrofa		25	FALSE	FALSE
LOBSTER	71	MMF	1700	2688	Palinurus elephas		5	TRUE	TRUE
LOBSTER	71	MMF	1700	2689	ND			TRUE	FALSE
LOBSTER	71	MMF	1703	2690	Palinurus elephas		5	TRUE	TRUE
LOBSTER	71	MMF	1703	2691	Raja sp.			TRUE	FALSE
LOBSTER	71	MMF	1704	2692	Raja clavata			TRUE	FALSE
LOBSTER	71	MMF	1705	2693	Lophius piscatorius	38		FALSE	FALSE
LOBSTER	71	MMF	1705	2694	Scorpaena scrofa		30	FALSE	FALSE
LOBSTER	71	MMF	1705	2695	Scyliorhinus canicula		40	TRUE	FALSE
LOBSTER	71	PMF	1706	2696	Scorpaena scrofa		30	FALSE	FALSE
LOBSTER	71	PMF	1706	2697	Raja sp.			TRUE	FALSE
LOBSTER	72	MMF	1713	2699	Palinurus elephas		15	TRUE	FALSE
LOBSTER	72	MMF	1716	2700	Palinurus elephas		15	FALSE	FALSE
LOBSTER	72	MMF	1716	2701	Raja clavata	84		TRUE	FALSE
LOBSTER	72	MMF	1718	2702	Palinurus elephas		15	FALSE	FALSE
LOBSTER	72	MMF	1727	2703	Merluccius merluccius		30	FALSE	FALSE
LOBSTER	72	MMF	1731	2704	Zeus faber	35		TRUE	FALSE
LOBSTER	72	MMF	1732	2705	Raja clavata	21		TRUE	FALSE
LOBSTER	72	MMF	1708	2698	Leucoraja naevus	37		TRUE	FALSE
LOBSTER	73	PMF	1735	2706	Charonia lampas	21.5		TRUE	TRUE
LOBSTER	73	PMF	1738	2707	Charonia lampas	21		TRUE	TRUE
LOBSTER	73	PMF	1739	2708	Raja clavata	29		TRUE	FALSE
LOBSTER	73	PMF	1740	2709	Raja miraletus	30		TRUE	TRUE
LOBSTER	73	PMF	1742	2710	Scorpaena scrofa	29		TRUE	FALSE
LOBSTER	73	PMF	1742	2711	Raja clavata	30		TRUE	FALSE
LOBSTER	73	PMF	1744	2712	Palinurus elephas		5	TRUE	TRUE
LOBSTER	73	PMF	1746	2713	Scorpaena scrofa	36		FALSE	FALSE
LOBSTER	73	PMF	1747	2714	Palinurus elephas		15	FALSE	FALSE
LOBSTER	73	PMF	1748	3457	Palinurus elephas		15	TRUE	FALSE
LOBSTER	73	PMF	1748	2715	Raja clavata	32		TRUE	FALSE
LOBSTER	73	PMF	1750	2716	Leucoraja naevus	45		TRUE	TRUE
LOBSTER	73	PMF	1750	2717	Scorpaena scrofa	36		FALSE	FALSE
LOBSTER	73	PMF	1751	2718	Scorpaena scrofa	32		TRUE	FALSE
LOBSTER	73	PMF	1753	2719	Raja clavata	42		TRUE	FALSE
LOBSTER	73	PMF	1754	2720	Lophius piscatorius	33		FALSE	FALSE
LOBSTER	73	PMF	1756	2721	Palinurus elephas		15	FALSE	FALSE
LOBSTER	73	PMF	1757	2722	Lophius piscatorius	36		TRUE	FALSE
LOBSTER	73	PMF	1757	2723	Palinurus elephas		15	FALSE	FALSE
LOBSTER	73	PMF	1758	2724	Palinurus elephas		5	TRUE	FALSE
LOBSTER	73	PMF	1759	2725	Palinurus elephas		15	FALSE	FALSE
LOBSTER	73	PMF	1759	2726	Scyliorhinus canicula	37		TRUE	FALSE
LOBSTER	73	PMF	1759	2727	Palinurus elephas		25	FALSE	FALSE
LOBSTER	73	PMF	1760	2728	Palinurus elephas		15	FALSE	FALSE
LOBSTER	73	PMF	1760	2729	Palinurus elephas		5	TRUE	TRUE
LOBSTER	74	MMF	1765	2730	Leucoraja naevus		30	TRUE	FALSE
LOBSTER	74	MMF	1766	2731	Palinurus elephas		15	FALSE	FALSE
LOBSTER	74	MMF	1766	2732	Holoturia sp.		20	TRUE	TRUE
LOBSTER	74	MMF	1766	2733	Holoturia sp.		20	TRUE	TRUE
LOBSTER	74	MMF	1767	2734	Leucoraja naevus		30	TRUE	FALSE
LOBSTER	74	MMF	1767	2735	Leucoraja naevus		30	TRUE	FALSE
LOBSTER	74	MMF	1768	2736	Leucoraja naevus		30	TRUE	FALSE
LOBSTER	74	MMF	1769	2737	Raja sp.	43		TRUE	FALSE
LOBSTER	74	MMF	1770	2738	Leucoraja naevus	35		TRUE	TRUE
LOBSTER	74	MMF	1771	2739	Leucoraja naevus		40	TRUE	TRUE
LOBSTER	74	MMF	1773	2740	Calappa granulata		10	TRUE	FALSE
LOBSTER	74	MMF	1773	2741	Leucoraja naevus	35		TRUE	TRUE
LOBSTER	74	MMF	1773	2742	Leucoraja naevus		40	TRUE	TRUE
LOBSTER	74	MMF	1774	2743	Palinurus elephas		15	FALSE	FALSE
LOBSTER	74	MMF	1774	2744	Raja clavata		35	TRUE	FALSE
LOBSTER	74	MMF	1774	2745	Palinurus elephas		15	TRUE	FALSE
LOBSTER	74	MMF	1774	2746	Palinurus elephas		15	TRUE	FALSE
LOBSTER	74	MMF	1774	2747	Leucoraja naevus		40	TRUE	TRUE
LOBSTER	74	MMF	1775	2748	Palinurus elephas		5	TRUE	TRUE
LOBSTER	74	MMF	1775	2749	Palinurus elephas		15	FALSE	FALSE
LOBSTER	74	MMF	1776	2750	Torpedo marmorata		45	TRUE	TRUE
LOBSTER	74	MMF	1776	2751	Holoturia sp.		20	TRUE	TRUE
LOBSTER	74	PMF	1777	2752	Leucoraja naevus		45	TRUE	TRUE
LOBSTER	74	PMF	1777	2753	Palinurus elephas		15	FALSE	FALSE
LOBSTER	74	PMF	1778	2754	Palinurus elephas		5	TRUE	TRUE
LOBSTER	74	PMF	1778	2755	Raja clavata		30	TRUE	FALSE
LOBSTER	74	PMF	1779	2756	Palinurus elephas		15	FALSE	FALSE
LOBSTER	74	PMF	1779	2757	Raja clavata		35	TRUE	FALSE
LOBSTER	74	PMF	1781	2758	Palinurus elephas		5	TRUE	FALSE
LOBSTER	74	PMF	1782	2759	Lophius piscatorius		60	FALSE	FALSE
LOBSTER	75	PMF	1784	2760	Scorpaena scrofa		30	TRUE	FALSE
LOBSTER	75	MMF	1785	2761	Scorpaena scrofa		20	TRUE	FALSE
LOBSTER	75	MMF	1785	2762	Scorpaena scrofa		35	TRUE	FALSE
LOBSTER	75	MMF	1786	2763	Palinurus elephas		15	FALSE	FALSE
LOBSTER	75	MMF	1786	2764	Palinurus elephas		15	FALSE	FALSE
LOBSTER	75	MMF	1787	2765	Palinurus elephas		15	FALSE	FALSE
LOBSTER	75	MMF	1787	2766	Palinurus elephas		15	FALSE	FALSE
LOBSTER	75	MMF	1787	2767	Palinurus elephas		15	FALSE	FALSE
LOBSTER	75	MMF	1787	2768	Raja clavata	60		TRUE	FALSE
LOBSTER	75	MMF	1789	2769	Peristedion cataphractum		25	FALSE	FALSE
LOBSTER	75	MMF	1791	2770	Leucoraja naevus		35	TRUE	FALSE
LOBSTER	75	MMF	1792	2771	Palinurus elephas		15	FALSE	FALSE
LOBSTER	75	MMF	1792	2772	Palinurus elephas		15	FALSE	FALSE
LOBSTER	75	MMF	1794	2773	Palinurus elephas		15	FALSE	FALSE
LOBSTER	75	MMF	1794	2774	Palinurus elephas		15	FALSE	FALSE
LOBSTER	75	MMF	1795	2775	Lophius piscatorius		45	FALSE	FALSE
LOBSTER	75	MMF	1795	2776	Leucoraja naevus		40	TRUE	TRUE
LOBSTER	75	MMF	1798	2777	Palinurus elephas		15	FALSE	FALSE
LOBSTER	75	MMF	1798	2778	Palinurus elephas		5	TRUE	TRUE
LOBSTER	75	MMF	1800	2779	Torpedo marmorata		40	TRUE	TRUE
LOBSTER	75	MMF	1800	2780	Palinurus elephas		15	FALSE	FALSE
LOBSTER	75	MMF	1800	2781	Scorpaena scrofa		35	FALSE	FALSE
LOBSTER	75	MMF	1800	2782	Leucoraja naevus		40	TRUE	TRUE
LOBSTER	75	MMF	1802	2783	Raja clavata		50	TRUE	FALSE
LOBSTER	75	MMF	1802	2784	Peristedion cataphractum		25	FALSE	FALSE
LOBSTER	75	MMF	1803	2786	Lophius piscatorius		45	FALSE	FALSE
LOBSTER	75	MMF	1804	2787	Palinurus elephas		15	FALSE	FALSE
LOBSTER	75	MMF	1806	2788	Palinurus elephas		15	TRUE	FALSE
LOBSTER	75	MMF	1806	2789	Leucoraja naevus		45	TRUE	TRUE
LOBSTER	75	MMF	1807	2790	Raja clavata		30	TRUE	FALSE
LOBSTER	76	MMF	1812	2791	Scorpaena scrofa	31		FALSE	FALSE
LOBSTER	76	MMF	1812	2792	Lophius piscatorius	62		FALSE	FALSE
LOBSTER	76	MMF+Greca	1815	2793	Scorpaena scrofa	30		FALSE	FALSE
LOBSTER	76	MMF	1816	2794	Zeus faber			FALSE	FALSE
LOBSTER	76	MMF	1816	2795	Palinurus elephas	10.2		FALSE	FALSE
LOBSTER	76	MMF+Greca	1817	2796	Scorpaena porcus			TRUE	FALSE
LOBSTER	77	MMF+Greca	1819	2797	Palinurus elephas	13.5		FALSE	FALSE
LOBSTER	77	MMF+Greca	1821	3458	Echinaster sepositus			TRUE	TRUE
LOBSTER	77	MMF+Greca	1823	2798	Scyliorhinus canicula	33		TRUE	FALSE
LOBSTER	77	MMF+Greca	1827	2799	Scyliorhinus canicula	37		TRUE	TRUE
LOBSTER	77	MMF	1828	3459	Echinaster sepositus			TRUE	TRUE
LOBSTER	77	MMF	1828	3460	Echinaster sepositus			TRUE	TRUE
LOBSTER	77	MMF	1828	3461	Echinaster sepositus			TRUE	TRUE
LOBSTER	77	MMF	1828	3462	Echinaster sepositus			TRUE	TRUE
LOBSTER	77	MMF	1828	3463	Echinaster sepositus			TRUE	TRUE
LOBSTER	78	PMF	1832	2805	Leucoraja naevus		40	TRUE	TRUE
LOBSTER	78	PMF	1834	2806	Raja clavata		30	TRUE	TRUE
LOBSTER	78	PMF	1834	2807	Palinurus elephas		15	FALSE	FALSE
LOBSTER	78	PMF	1835	2808	Palinurus elephas		25	FALSE	FALSE
LOBSTER	78	PMF	1835	2809	Palinurus elephas		25	FALSE	FALSE
LOBSTER	78	PMF	1837	2810	Scorpaena scrofa		40	FALSE	FALSE
LOBSTER	78	PMF	1838	2811	Leucoraja naevus		40	TRUE	TRUE
LOBSTER	78	PMF	1838	2812	Leucoraja naevus		35	TRUE	TRUE
LOBSTER	78	PMF	1839	2813	Palinurus elephas		15	FALSE	FALSE
LOBSTER	78	PMF	1840	2814	Raja clavata		38	TRUE	FALSE
LOBSTER	78	PMF	1841	2815	Palinurus elephas		15	TRUE	FALSE
LOBSTER	78	PMF	1842	2816	Palinurus elephas		15	FALSE	FALSE
LOBSTER	78	PMF	1843	2817	Raja clavata		40	TRUE	FALSE
LOBSTER	78	PMF	1844	2818	Palinurus elephas		15	TRUE	FALSE
LOBSTER	78	PMF	1845	2819	Raja clavata		35	TRUE	FALSE
LOBSTER	78	PMF	1846	2820	Raja clavata		35	TRUE	FALSE
LOBSTER	78	PMF	1846	2821	Raja clavata		35	TRUE	FALSE
LOBSTER	78	PMF	1847	2822	Raja clavata		45	TRUE	FALSE
LOBSTER	78	PMF	1847	2823	Raja clavata		45	TRUE	FALSE
LOBSTER	78	PMF	1848	2824	Palinurus elephas		15	FALSE	FALSE
LOBSTER	78	PMF	1849	2825	Raja clavata		20	TRUE	TRUE
LOBSTER	78	PMF	1849	2826	Raja montagui		25	TRUE	TRUE
LOBSTER	78	PMF	1850	2827	Leucoraja naevus		30	TRUE	TRUE
LOBSTER	78	PMF	1850	2828	Raja clavata		45	TRUE	FALSE
LOBSTER	78	PMF	1850	2829	Raja miraletus		35	TRUE	TRUE
LOBSTER	78	PMF	1850	2830	Raja clavata		40	TRUE	FALSE
LOBSTER	78	PMF	1850	2831	Raja clavata		35	TRUE	FALSE
LOBSTER	78	PMF	1852	2832	Raja clavata		35	TRUE	FALSE
LOBSTER	78	PMF	1853	2833	Raja clavata		35	TRUE	FALSE
LOBSTER	78	PMF	1854	2834	Palinurus elephas		15	FALSE	FALSE
LOBSTER	78	PMF	1829	2800	Raja clavata	38		TRUE	FALSE
LOBSTER	78	PMF	1829	2801	Leucoraja naevus	40		TRUE	TRUE
LOBSTER	78	PMF	1829	2802	Palinurus elephas		15	FALSE	FALSE
LOBSTER	78	PMF	1830	2803	Leucoraja naevus		40	TRUE	TRUE
LOBSTER	78	PMF	1830	2804	Palinurus elephas		15	TRUE	FALSE
LOBSTER	79	PMF	1855	2835	Leucoraja naevus		35	TRUE	TRUE
LOBSTER	79	PMF	1856	2836	Palinurus elephas		15	FALSE	FALSE
LOBSTER	79	PMF	1857	2837	Palinurus elephas		15	FALSE	FALSE
LOBSTER	79	PMF	1857	2838	Raja clavata		35	TRUE	FALSE
LOBSTER	79	PMF	1858	2839	Raja miraletus	37		TRUE	TRUE
LOBSTER	79	PMF	1858	2840	Raja clavata		45	TRUE	FALSE
LOBSTER	79	PMF	1858	2841	Raja clavata		45	FALSE	FALSE
LOBSTER	79	PMF	1862	2842	Leucoraja naevus		20	TRUE	TRUE
LOBSTER	79	PMF	1862	2843	Raja clavata		35	FALSE	FALSE
LOBSTER	79	PMF	1863	2844	Scorpaena scrofa		40	FALSE	FALSE
LOBSTER	79	PMF	1863	2845	Raja clavata		60	TRUE	FALSE
LOBSTER	79	PMF	1865	2846	Raja clavata		45	TRUE	FALSE
LOBSTER	79	PMF	1866	2847	Raja clavata		40	TRUE	FALSE
LOBSTER	79	PMF	1866	2848	Raja montagui		20	TRUE	TRUE
LOBSTER	79	PMF	1867	2849	Scorpaena scrofa		35	FALSE	FALSE
LOBSTER	79	PMF	1867	2850	Raja clavata		30	TRUE	FALSE
LOBSTER	79	PMF	1867	2851	Leucoraja naevus		30	TRUE	TRUE
LOBSTER	79	PMF	1868	2852	Raja montagui		35	TRUE	TRUE
LOBSTER	79	PMF	1868	2853	Scorpaena scrofa		35	TRUE	FALSE
LOBSTER	79	PMF	1868	2854	Raja montagui		30	TRUE	TRUE
LOBSTER	79	PMF	1868	2855	Palinurus elephas		15	FALSE	FALSE
LOBSTER	79	PMF	1868	2856	Serranus cabrilla	12		TRUE	FALSE
LOBSTER	79	PMF	1868	2857	Serranus cabrilla	20		TRUE	FALSE
LOBSTER	79	PMF	1868	2858	Palinurus elephas		15	FALSE	FALSE
LOBSTER	79	PMF	1868	2859	Raja montagui		30	TRUE	TRUE
LOBSTER	79	PMF	1868	2860	Calappa granulata		10	TRUE	FALSE
LOBSTER	79	PMF	1869	2861	Palinurus elephas		25	FALSE	FALSE
LOBSTER	79	PMF	1869	2862	Raja clavata		40	TRUE	FALSE
LOBSTER	79	PMF	1870	2863	Leucoraja naevus		45	TRUE	TRUE
LOBSTER	79	PMF	1870	2864	Raja clavata		50	TRUE	FALSE
LOBSTER	79	PMF	1870	2865	Raja clavata		40	TRUE	FALSE
LOBSTER	79	PMF	1870	2866	Raja clavata		65	TRUE	FALSE
LOBSTER	79	PMF	1870	2867	Raja clavata		50	TRUE	FALSE
LOBSTER	79	PMF	1871	2868	Raja clavata		40	TRUE	FALSE
LOBSTER	79	PMF	1871	2869	Leucoraja naevus		45	TRUE	TRUE
LOBSTER	79	PMF	1871	2870	Raja clavata		30	TRUE	FALSE
LOBSTER	79	PMF	1872	2871	Raja clavata		30	TRUE	FALSE
LOBSTER	79	PMF	1872	2872	Raja clavata		40	TRUE	FALSE
LOBSTER	79	PMF	1872	2873	Raja miraletus		30	TRUE	TRUE
LOBSTER	79	PMF	1873	2874	Raja clavata		30	TRUE	FALSE
LOBSTER	79	PMF	1874	2875	Raja clavata		30	TRUE	FALSE
LOBSTER	79	PMF	1874	2876	Raja miraletus		30	TRUE	TRUE
LOBSTER	79	PMF	1874	2877	Raja clavata		35	TRUE	FALSE
LOBSTER	79	PMF	1875	2878	Raja montagui		45	TRUE	TRUE
LOBSTER	79	PMF	1875	2879	Leucoraja naevus		45	TRUE	TRUE
LOBSTER	79	PMF	1876	2880	Raja clavata		50	TRUE	FALSE
LOBSTER	79	PMF	1876	2881	Raja montagui		30	TRUE	TRUE
LOBSTER	79	PMF	1877	2882	Raja clavata		50	TRUE	FALSE
LOBSTER	79	PMF	1877	2883	Leucoraja naevus		45	TRUE	TRUE
LOBSTER	79	PMF	1878	2884	Raja clavata		45	TRUE	FALSE
LOBSTER	79	PMF	1878	2885	Raja clavata		45	TRUE	FALSE
LOBSTER	79	PMF	1878	2886	Raja clavata		40	TRUE	FALSE
LOBSTER	80	MMF	1882	2887	Raja clavata		40	TRUE	FALSE
LOBSTER	80	MMF	1882	2888	Palinurus elephas		15	FALSE	FALSE
LOBSTER	80	MMF	1882	2889	Scyliorhinus canicula		25	TRUE	FALSE
LOBSTER	80	MMF	1882	2890	Calappa granulata		10	TRUE	FALSE
LOBSTER	80	MMF	1883	2891	Lophius piscatorius		30	FALSE	FALSE
LOBSTER	80	MMF	1885	2892	Scorpaena scrofa		20	TRUE	FALSE
LOBSTER	80	MMF	1887	2893	Scyliorhinus canicula		25	TRUE	FALSE
LOBSTER	80	MMF	1887	2894	Palinurus elephas		25	FALSE	FALSE
LOBSTER	80	MMF	1888	2895	Palinurus elephas		15	FALSE	FALSE
LOBSTER	80	MMF	1889	2896	Peristedion cataphractum		15	TRUE	FALSE
LOBSTER	80	MMF	1891	2897	Leucoraja naevus		35	TRUE	TRUE
LOBSTER	80	MMF	1893	2898	Peristedion cataphractum		10	TRUE	FALSE
LOBSTER	80	MMF	1901	2899	Raja clavata		35	TRUE	FALSE
LOBSTER	80	MMF	1901	2900	Leucoraja naevus		40	TRUE	FALSE
LOBSTER	80	MMF	1901	2901	Raja clavata		40	TRUE	FALSE
LOBSTER	80	MMF	1902	2902	Leucoraja naevus		40	TRUE	TRUE
LOBSTER	80	MMF	1902	2903	Parablennius gattorugine		10	TRUE	FALSE
LOBSTER	81	PMF	1904	2904	Lophius piscatorius		40	FALSE	FALSE
LOBSTER	81	PMF	1904	2905	Palinurus elephas		25	FALSE	FALSE
LOBSTER	81	PMF	1904	2906	Leucoraja naevus		35	TRUE	TRUE
LOBSTER	81	PMF	1904	2907	Raja clavata		40	TRUE	FALSE
LOBSTER	81	PMF	1904	2908	Raja clavata		30	TRUE	FALSE
LOBSTER	81	PMF	1905	2909	Holoturia sp.		20	TRUE	TRUE
LOBSTER	81	PMF	1906	2910	Raja clavata		35	TRUE	FALSE
LOBSTER	81	PMF	1907	2911	Leucoraja naevus		35	TRUE	TRUE
LOBSTER	81	PMF	1908	2912	Raja sp.		25	TRUE	FALSE
LOBSTER	81	PMF	1909	2913	Scorpaena scrofa		35	TRUE	FALSE
LOBSTER	81	PMF	1910	2914	Raja sp.		15	TRUE	FALSE
LOBSTER	81	PMF	1911	2915	Leucoraja naevus		35	TRUE	TRUE
LOBSTER	81	PMF	1912	2916	Raja clavata		30	TRUE	FALSE
LOBSTER	81	PMF	1912	2917	Palinurus elephas		15	FALSE	FALSE
LOBSTER	81	PMF	1913	2918	Raja sp.		25	TRUE	FALSE
LOBSTER	81	PMF	1914	2919	Leucoraja naevus		30	TRUE	TRUE
LOBSTER	81	PMF	1915	2920	Raja sp.		25	TRUE	FALSE
LOBSTER	81	PMF	1915	2921	Raja clavata		30	TRUE	FALSE
LOBSTER	81	PMF	1917	2922	Raja sp.		25	TRUE	FALSE
LOBSTER	81	PMF	1917	2923	Raja sp.		20	TRUE	FALSE
LOBSTER	81	PMF	1918	2924	Raja clavata		40	FALSE	FALSE
LOBSTER	81	PMF	1918	2925	Palinurus elephas		15	TRUE	FALSE
LOBSTER	81	PMF	1919	2926	Leucoraja naevus		35	TRUE	TRUE
LOBSTER	81	PMF	1921	2927	Raja sp.		35	TRUE	FALSE
LOBSTER	81	PMF	1922	2928	Leucoraja naevus		40	TRUE	TRUE
LOBSTER	81	PMF	1922	2929	Calappa granulata		10	TRUE	FALSE
LOBSTER	81	PMF	1922	2930	Scorpaena scrofa		30	FALSE	FALSE
LOBSTER	81	PMF	1923	2931	Raja clavata		35	TRUE	FALSE
LOBSTER	81	PMF	1924	2932	Raja sp.		35	TRUE	FALSE
LOBSTER	81	PMF	1924	2933	Pagellus erythrinus		15	TRUE	FALSE
LOBSTER	82	MMF	1927	2934	Palinurus elephas	10.5		FALSE	FALSE
LOBSTER	82	MMF+Greca	1928	2935	Scorpaena scrofa	12		TRUE	TRUE
LOBSTER	82	MMF+Greca	1928	2936	Scorpaena scrofa	31		FALSE	FALSE
LOBSTER	82	MMF+Greca	1928	2937	Scyliorhinus canicula	36		TRUE	FALSE
LOBSTER	82	MMF+Greca	1928	2938	Scyliorhinus canicula	37		TRUE	FALSE
LOBSTER	82	MMF	1929	2939	Raja sp.			TRUE	FALSE
LOBSTER	82	MMF	1931	3464	Echinaster sepositus			TRUE	TRUE
LOBSTER	82	MMF+Greca	1932	2940	Scyliorhinus canicula	35		TRUE	FALSE
LOBSTER	82	MMF+Greca	1932	2941	Scyliorhinus canicula	40		TRUE	TRUE
LOBSTER	82	MMF+Greca	1932	2942	Scyliorhinus canicula	34		TRUE	FALSE
LOBSTER	82	MMF+Greca	1932	2943	Scyliorhinus canicula		40	TRUE	FALSE
LOBSTER	82	MMF+Greca	1932	2944	Solea sp.	15		TRUE	TRUE
LOBSTER	82	MMF+Greca	1934	2945	Scyliorhinus canicula	43		TRUE	FALSE
LOBSTER	82	MMF+Greca	1934	2946	Serranus cabrilla			TRUE	FALSE
LOBSTER	82	MMF+Greca	1934	3465	Echinaster sepositus			TRUE	TRUE
LOBSTER	82	MMF+Greca	1936	2947	Palinurus elephas	8.8		TRUE	TRUE
LOBSTER	82	MMF+Greca	1936	2948	Palinurus elephas	9		FALSE	FALSE
LOBSTER	82	MMF+Greca	1936	2949	Palinurus elephas	10.5		FALSE	FALSE
LOBSTER	82	MMF+Greca	1936	2950	Palinurus elephas	13		FALSE	FALSE
LOBSTER	82	MMF+Greca	1936	2951	Palinurus elephas	9.2		FALSE	FALSE
LOBSTER	83	MMF	1937	2952	Holoturia sp.		20	TRUE	TRUE
LOBSTER	83	MMF	1937	3466	Echinaster sepositus			TRUE	TRUE
LOBSTER	83	MMF+Greca	1938	2953	Scorpaena scrofa	42		TRUE	FALSE
LOBSTER	83	MMF	1939	2954	Scorpaena scrofa	37		FALSE	FALSE
LOBSTER	83	MMF	1939	2955	Holoturia sp.		20	TRUE	TRUE
LOBSTER	83	MMF+Greca	1940	2956	Scyliorhinus canicula	35		TRUE	FALSE
LOBSTER	83	MMF+Greca	1940	2957	Scyliorhinus canicula	37		TRUE	TRUE
LOBSTER	83	MMF+Greca	1940	2958	Scyliorhinus canicula	40		TRUE	FALSE
LOBSTER	83	MMF+Greca	1940	2959	Scorpaena scrofa	39		TRUE	FALSE
LOBSTER	83	MMF+Greca	1940	2960	Palinurus elephas	10.5		FALSE	FALSE
LOBSTER	83	MMF+Greca	1940	2961	Scyliorhinus canicula	38		TRUE	FALSE
LOBSTER	83	MMF	1941	2962	Raja polystigma	32		TRUE	TRUE
LOBSTER	83	MMF	1941	2963	Palinurus elephas	9.5		FALSE	FALSE
LOBSTER	83	MMF	1941	2964	Raja clavata	44.5		TRUE	FALSE
LOBSTER	83	MMF	1941	2965	Raja clavata	49		FALSE	FALSE
LOBSTER	83	MMF	1941	3467	Echinaster sepositus			TRUE	TRUE
LOBSTER	83	MMF+Greca	1942	2966	Scyliorhinus canicula	40		TRUE	FALSE
LOBSTER	83	MMF+Greca	1942	2967	Serranus cabrilla	20		TRUE	FALSE
LOBSTER	83	MMF+Greca	1942	2968	Palinurus elephas	9.5		FALSE	FALSE
LOBSTER	83	MMF+Greca	1942	2969	Scorpaena scrofa			TRUE	FALSE
LOBSTER	83	MMF	1943	2970	Raja miraletus	25		TRUE	TRUE
LOBSTER	83	MMF+Greca	1944	2971	Palinurus elephas	9		FALSE	FALSE
LOBSTER	83	MMF+Greca	1944	2972	Palinurus elephas	10.5		FALSE	FALSE
LOBSTER	83	MMF+Greca	1944	2973	Palinurus elephas	13		FALSE	FALSE
LOBSTER	83	MMF+Greca	1944	2974	Palinurus elephas	9.5		FALSE	FALSE
LOBSTER	83	MMF+Greca	1946	2975	Trachinus radiatus	29		TRUE	FALSE
LOBSTER	83	MMF+Greca	1946	2976	Palinurus elephas	11		FALSE	FALSE
LOBSTER	83	MMF+Greca	1946	2977	Palinurus elephas	9.5		FALSE	FALSE
LOBSTER	83	MMF+Greca	1946	2978	Scyliorhinus canicula	36		TRUE	FALSE
LOBSTER	83	MMF+Greca	1946	2979	Scyliorhinus canicula	31		TRUE	FALSE
LOBSTER	84	MMF+Greca	1947	2980	Scyliorhinus canicula	36		TRUE	FALSE
LOBSTER	84	MMF+Greca	1947	2981	Scyliorhinus canicula	30		TRUE	FALSE
LOBSTER	84	MMF+Greca	1947	2982	Scyliorhinus canicula	34		TRUE	FALSE
LOBSTER	84	MMF+Greca	1947	2983	Scyliorhinus canicula	38		TRUE	FALSE
LOBSTER	84	MMF+Greca	1947	2984	Scyliorhinus canicula	33		TRUE	TRUE
LOBSTER	84	MMF	1948	2985	Leucoraja naevus	17.7		TRUE	TRUE
LOBSTER	84	MMF	1948	3468	Echinaster sepositus	42		TRUE	TRUE
LOBSTER	84	MMF+Greca	1949	2986	Serranus cabrilla			TRUE	FALSE
LOBSTER	84	MMF	1950	2987	Scorpaena scrofa	34		FALSE	FALSE
LOBSTER	84	MMF	1950	2988	Palinurus elephas	9.2		FALSE	FALSE
LOBSTER	84	MMF	1950	2989	Palinurus elephas	9.5		FALSE	FALSE
LOBSTER	84	MMF	1950	2990	Palinurus elephas	9.5		FALSE	FALSE
LOBSTER	84	MMF	1950	2991	Palinurus elephas	10		FALSE	FALSE
LOBSTER	84	MMF	1950	2992	Palinurus elephas	7.5		TRUE	TRUE
LOBSTER	84	MMF	1950	2993	Palinurus elephas	9.5		FALSE	FALSE
LOBSTER	84	MMF	1950	2994	Palinurus elephas	10.5		FALSE	FALSE
LOBSTER	84	MMF	1950	2995	Palinurus elephas	11.5		FALSE	FALSE
LOBSTER	84	MMF	1950	2996	Palinurus elephas	10		FALSE	FALSE
LOBSTER	84	MMF+Greca	1951	2997	Scorpaena scrofa	32		FALSE	FALSE
LOBSTER	84	MMF+Greca	1951	2998	Serranus cabrilla	18		TRUE	FALSE
LOBSTER	84	MMF+Greca	1951	2999	Serranus cabrilla	21		TRUE	FALSE
LOBSTER	84	MMF	1952	3000	Raja polystigma	42.2		TRUE	FALSE
LOBSTER	84	MMF	1952	3001	Palinurus elephas	9.5		FALSE	FALSE
LOBSTER	84	MMF	1952	3469	Echinaster sepositus			TRUE	TRUE
LOBSTER	84	MMF+Greca	1953	3002	Serranus cabrilla	19		TRUE	FALSE
LOBSTER	84	MMF+Greca	1955	3003	Palinurus elephas	11		FALSE	FALSE
LOBSTER	84	MMF+Greca	1955	3004	Scyliorhinus canicula	31		TRUE	FALSE
LOBSTER	84	MMF	1956	3005	Palinurus elephas	9.5		FALSE	FALSE
LOBSTER	85	MMF+Greca	1957	3006	Palinurus elephas	11.5		FALSE	FALSE
LOBSTER	85	MMF	1958	3007	Palinurus elephas	10.2		FALSE	FALSE
LOBSTER	85	MMF	1958	3008	Palinurus elephas	7.5		TRUE	TRUE
LOBSTER	85	MMF+Greca	1959	3009	Palinurus elephas	11		FALSE	FALSE
LOBSTER	85	MMF+Greca	1959	3010	Palinurus elephas	10.5		TRUE	FALSE
LOBSTER	85	MMF+Greca	1959	3011	Palinurus elephas	10		FALSE	FALSE
LOBSTER	85	MMF+Greca	1959	3012	Palinurus elephas	10		FALSE	FALSE
LOBSTER	85	MMF+Greca	1959	3013	Palinurus elephas	10		FALSE	FALSE
LOBSTER	85	MMF+Greca	1959	3014	Palinurus elephas	8.8		TRUE	TRUE
LOBSTER	85	MMF+Greca	1959	3015	Palinurus elephas	10		FALSE	FALSE
LOBSTER	85	MMF+Greca	1959	3016	Palinurus elephas	11		FALSE	FALSE
LOBSTER	85	MMF+Greca	1959	3017	Scyliorhinus canicula	41		TRUE	TRUE
LOBSTER	85	MMF	1960	3018	Palinurus elephas	9.2		FALSE	FALSE
LOBSTER	85	MMF	1960	3019	Palinurus elephas	8.8		TRUE	TRUE
LOBSTER	85	MMF	1960	3020	Phycis sp.	35		FALSE	FALSE
LOBSTER	85	MMF+Greca	1961	3021	Scyliorhinus canicula	35.5		TRUE	TRUE
LOBSTER	85	MMF+Greca	1961	3022	Scyliorhinus canicula	34		TRUE	TRUE
LOBSTER	85	MMF+Greca	1963	3023	Scyliorhinus canicula	37		TRUE	TRUE
LOBSTER	85	MMF+Greca	1963	3024	Scyliorhinus canicula	36		TRUE	FALSE
LOBSTER	85	MMF+Greca	1963	3025	Palinurus elephas	10.5		FALSE	FALSE
LOBSTER	85	MMF+Greca	1965	3026	Lophius piscatorius	37		FALSE	FALSE
LOBSTER	85	MMF+Greca	1965	3027	Scyliorhinus canicula	37		TRUE	FALSE
LOBSTER	85	MMF	1966	3028	Palinurus elephas	12		FALSE	FALSE
LOBSTER	85	MMF	1966	3029	Palinurus elephas	7.6		TRUE	TRUE
LOBSTER	85	MMF	1966	3030	Holoturia sp.		20	TRUE	TRUE
LOBSTER	86	MMF	1968	3031	Dasyatis pastinaca			TRUE	FALSE
LOBSTER	86	MMF	1968	3032	Palinurus elephas	13.4		FALSE	FALSE
LOBSTER	86	MMF	1969	3033	Lophius piscatorius			TRUE	FALSE
LOBSTER	86	MMF	1969	3470	Echinaster sepositus			TRUE	TRUE
LOBSTER	86	MMF	1969	3471	Echinaster sepositus			TRUE	TRUE
LOBSTER	86	MMF	1970	3034	Palinurus elephas	8.5		TRUE	TRUE
LOBSTER	86	MMF	1970	3472	Echinaster sepositus			TRUE	TRUE
LOBSTER	86	MMF	1971	3035	Palinurus elephas	9		FALSE	FALSE
LOBSTER	86	MMF	1972	3036	Palinurus elephas	10		FALSE	FALSE
LOBSTER	86	MMF	1972	3037	Palinurus elephas	9.1		FALSE	FALSE
LOBSTER	86	MMF	1972	3038	Raja sp.			TRUE	FALSE
LOBSTER	86	MMF	1972	3039	Lophius piscatorius	54		FALSE	FALSE
LOBSTER	86	MMF	1973	3040	Palinurus elephas	7.6		TRUE	TRUE
LOBSTER	86	MMF	1973	3041	Palinurus elephas	10		FALSE	FALSE
LOBSTER	86	MMF	1973	3042	Scorpaena scrofa	29.5		FALSE	FALSE
LOBSTER	86	MMF	1973	3043	Scorpaena scrofa			TRUE	FALSE
LOBSTER	87	PMF	1974	3044	Raja sp.		30	TRUE	FALSE
LOBSTER	87	MMF	1977	3046	ND			TRUE	FALSE
LOBSTER	87	MMF	1978	3047	ND			TRUE	FALSE
LOBSTER	87	MMF	1982	3049	Scyliorhinus canicula		40	TRUE	FALSE
LOBSTER	87	MMF	1983	3050	Palinurus elephas		15	FALSE	FALSE
LOBSTER	87	MMF	1984	3051	Palinurus elephas		15	FALSE	FALSE
LOBSTER	87	MMF	1984	3052	Raja clavata		60	TRUE	FALSE
LOBSTER	87	MMF	1985	3053	Scyliorhinus canicula			TRUE	FALSE
LOBSTER	87	MMF	1985	3054	Palinurus elephas		15	FALSE	FALSE
LOBSTER	87	MMF	1986	3056	Calappa granulata			TRUE	TRUE
LOBSTER	87	MMF	1988	3059	Scyliorhinus canicula			TRUE	FALSE
LOBSTER	87	MMF	1988	3060	Palinurus elephas			TRUE	FALSE
LOBSTER	87	MMF	1991	3061	Scyliorhinus canicula			TRUE	FALSE
LOBSTER	87	MMF	1991	3062	Scyliorhinus canicula			TRUE	FALSE
LOBSTER	87	MMF	1991	3063	Scyliorhinus canicula			TRUE	FALSE
LOBSTER	87	MMF	1991	3064	Scyliorhinus canicula			TRUE	FALSE
LOBSTER	87	MMF	1992	3065	Palinurus elephas		15	FALSE	FALSE
LOBSTER	87	MMF	1992	3066	Palinurus elephas		15	FALSE	FALSE
LOBSTER	87	MMF	1992	3067	Scyliorhinus canicula			TRUE	FALSE
LOBSTER	87	MMF	1993	3068	Palinurus elephas		15	FALSE	FALSE
LOBSTER	87	MMF	1994	3069	Palinurus elephas		15	FALSE	FALSE
LOBSTER	87	MMF	1994	3070	Palinurus elephas		15	FALSE	FALSE
LOBSTER	87	MMF	1995	3071	Palinurus elephas		15	FALSE	FALSE
LOBSTER	87	MMF	1996	3072	ND			TRUE	FALSE
LOBSTER	87	MMF	1996	3073	Palinurus elephas		25	FALSE	FALSE
LOBSTER	87	PMF	1997	3074	Palinurus elephas		25	FALSE	FALSE
LOBSTER	87	PMF	1997	3075	ND			TRUE	FALSE
LOBSTER	88	PMF	2002	3076	Raja sp.			TRUE	FALSE
LOBSTER	88	PMF	2004	3078	Raja sp.			TRUE	FALSE
LOBSTER	88	PMF	2005	3079	Palinurus elephas		15	FALSE	FALSE
LOBSTER	88	PMF	2006	3080	Scorpaena scrofa			TRUE	FALSE
LOBSTER	88	PMF	2007	3081	Calappa granulata		10	TRUE	FALSE
LOBSTER	88	PMF	2007	3082	Palinurus elephas		15	FALSE	FALSE
LOBSTER	88	PMF	2007	3083	Palinurus elephas		15	FALSE	FALSE
LOBSTER	88	PMF	2007	3084	Calappa granulata		10	TRUE	FALSE
LOBSTER	88	PMF	2007	3085	Leucoraja naevus		30	TRUE	FALSE
LOBSTER	88	PMF	2007	3086	Palinurus elephas		15	FALSE	FALSE
LOBSTER	88	PMF	2008	3087	Palinurus elephas		15	TRUE	FALSE
LOBSTER	88	PMF	2011	3088	Raja clavata		60	TRUE	FALSE
LOBSTER	88	PMF	2013	3090	Palinurus elephas		15	FALSE	FALSE
LOBSTER	88	PMF	2014	3092	ND			TRUE	FALSE
LOBSTER	88	PMF	2015	3094	ND			TRUE	FALSE
LOBSTER	88	PMF	2015	3095	ND			TRUE	FALSE
LOBSTER	88	PMF	2018	3096	Raja sp.		30	TRUE	FALSE
LOBSTER	88	PMF	2021	3097	Raja clavata		60	TRUE	FALSE
LOBSTER	88	PMF	2021	3098	ND			TRUE	FALSE
LOBSTER	88	PMF	2022	3099	Calappa granulata			TRUE	FALSE
LOBSTER	88	PMF	2022	3100	ND			TRUE	FALSE
LOBSTER	89	MMF	2027	3101	Palinurus elephas		15	FALSE	FALSE
LOBSTER	89	MMF	2027	3102	Scorpaena scrofa		35	TRUE	FALSE
LOBSTER	89	MMF	2027	3103	Palinurus elephas		15	FALSE	FALSE
LOBSTER	89	MMF	2028	3104	Scyliorhinus canicula		35	TRUE	FALSE
LOBSTER	89	MMF	2028	3105	Raja clavata		40	TRUE	FALSE
LOBSTER	89	MMF	2029	3106	Peristedion cataphractum		30	FALSE	FALSE
LOBSTER	89	MMF	2029	3107	Raja clavata		40	TRUE	FALSE
LOBSTER	89	MMF	2030	3108	Leucoraja naevus		40	TRUE	TRUE
LOBSTER	89	MMF	2031	3109	Leucoraja naevus		40	TRUE	TRUE
LOBSTER	89	MMF	2033	3110	Peristedion cataphractum		35	TRUE	FALSE
LOBSTER	89	MMF	2033	3111	Calappa granulata		10	TRUE	FALSE
LOBSTER	89	MMF	2034	3112	Trigla lyra		40	FALSE	FALSE
LOBSTER	89	MMF	2034	3113	Raja clavata		45	TRUE	FALSE
LOBSTER	89	MMF	2035	3114	Palinurus elephas		15	FALSE	FALSE
LOBSTER	89	MMF	2035	3115	Scyliorhinus canicula		35	TRUE	FALSE
LOBSTER	89	MMF	2036	3116	Palinurus elephas		15	FALSE	FALSE
LOBSTER	89	MMF	2036	3117	Palinurus elephas		15	FALSE	FALSE
LOBSTER	89	MMF	2036	3118	Leucoraja naevus		45	TRUE	TRUE
LOBSTER	89	MMF	2039	3119	Trigla lyra		35	FALSE	FALSE
LOBSTER	89	MMF	2046	3120	Scyliorhinus canicula		20	TRUE	FALSE
LOBSTER	90	MMF	2052	3121	Palinurus elephas		15	FALSE	FALSE
LOBSTER	90	MMF	2052	3122	Palinurus elephas		15	FALSE	FALSE
LOBSTER	90	MMF	2054	3123	Raja clavata		45	TRUE	FALSE
LOBSTER	90	MMF	2055	3124	Raja clavata		40	TRUE	FALSE
LOBSTER	90	MMF	2056	3125	Peristedion cataphractum		20	TRUE	FALSE
LOBSTER	90	MMF	2056	3126	Raja clavata		45	TRUE	FALSE
LOBSTER	90	MMF	2056	3127	Palinurus elephas		15	FALSE	FALSE
LOBSTER	90	MMF	2058	3128	Leucoraja naevus		40	TRUE	TRUE
LOBSTER	90	MMF	2059	3129	Raja clavata		40	TRUE	FALSE
LOBSTER	90	MMF	2061	3130	Raja clavata		35	TRUE	FALSE
LOBSTER	90	MMF	2062	3131	Raja clavata		35	TRUE	FALSE
LOBSTER	90	MMF	2063	3132	Leucoraja naevus		40	TRUE	TRUE
LOBSTER	90	MMF	2064	3133	Palinurus elephas		15	FALSE	FALSE
LOBSTER	90	PMF	2066	3134	Raja clavata		35	TRUE	FALSE
LOBSTER	90	PMF	2066	3135	Raja clavata		50	TRUE	FALSE
LOBSTER	90	PMF	2066	3136	Raja clavata		45	TRUE	FALSE
LOBSTER	90	PMF	2067	3137	Lophius piscatorius		40	TRUE	FALSE
LOBSTER	90	PMF	2068	3138	Palinurus elephas		15	FALSE	FALSE
LOBSTER	90	PMF	2068	3139	Palinurus elephas		15	FALSE	FALSE
LOBSTER	90	PMF	2069	3140	Raja clavata		50	TRUE	FALSE
LOBSTER	90	PMF	2069	3141	Raja clavata		35	TRUE	FALSE
LOBSTER	90	PMF	2070	3142	Raja clavata	40		TRUE	FALSE
LOBSTER	90	PMF	2070	3143	Leucoraja naevus	45		TRUE	TRUE
LOBSTER	90	PMF	2073	3144	Palinurus elephas		15	FALSE	FALSE
LOBSTER	90	PMF	2074	3473	Palinurus elephas		15	FALSE	FALSE
LOBSTER	91	MMF+Greca	2077	3145	Scyliorhinus canicula		30	TRUE	FALSE
LOBSTER	91	MMF	2078	3146	Palinurus elephas		15	FALSE	FALSE
LOBSTER	91	MMF	2080	3147	Palinurus elephas	6		TRUE	TRUE
LOBSTER	91	MMF	2082	3148	Palinurus elephas	8		TRUE	TRUE
LOBSTER	91	MMF	2082	3149	Palinurus elephas	6		TRUE	TRUE
LOBSTER	91	MMF+Greca	2083	3150	Palinurus elephas	8.5		TRUE	TRUE
LOBSTER	91	MMF+Greca	2083	3151	Scyliorhinus canicula	13		TRUE	FALSE
LOBSTER	91	MMF+Greca	2083	3152	Palinurus elephas	9.2		FALSE	FALSE
LOBSTER	92	MMF+Greca	2088	3153	Palinurus elephas	7.4		TRUE	TRUE
LOBSTER	92	MMF+Greca	2090	3154	Lophius piscatorius		100	FALSE	FALSE
LOBSTER	92	MMF+Greca	2090	3155	Pagellus erythrinus		20	TRUE	FALSE
LOBSTER	92	MMF	2091	3156	Scyliorhinus canicula	39		TRUE	TRUE
LOBSTER	92	MMF	2091	3157	Pagellus erythrinus	22		TRUE	FALSE
LOBSTER	92	MMF+Greca	2092	3158	Scyliorhinus canicula	42		TRUE	FALSE
LOBSTER	92	MMF+Greca	2092	3159	Palinurus elephas	8		TRUE	TRUE
LOBSTER	92	MMF+Greca	2094	3160	Palinurus elephas	7.5		TRUE	TRUE
LOBSTER	92	MMF+Greca	2094	3161	Scorpaena scrofa	26		FALSE	FALSE
LOBSTER	93	PMF	2096	3162	Raja sp.		25	TRUE	FALSE
LOBSTER	93	PMF	2097	3163	Raja polystigma		30	TRUE	FALSE
LOBSTER	93	PMF	2098	3164	Raja sp.		25	TRUE	FALSE
LOBSTER	93	PMF	2098	3165	Merluccius merluccius		30	TRUE	FALSE
LOBSTER	93	PMF	2098	3166	Zeus faber		15	TRUE	FALSE
LOBSTER	93	PMF	2099	3167	Rostroraja alba		60	TRUE	TRUE
LOBSTER	93	PMF	2099	3168	Raja sp.		30	TRUE	FALSE
LOBSTER	93	PMF	2101	3169	Scyliorhinus canicula	26		TRUE	FALSE
LOBSTER	93	PMF	2101	3170	Scyliorhinus canicula	27		TRUE	FALSE
LOBSTER	93	PMF	2101	3171	Scyliorhinus canicula	20		TRUE	FALSE
LOBSTER	93	PMF	2101	3172	Scyliorhinus canicula	30		TRUE	FALSE
LOBSTER	93	PMF	2101	3173	Scyliorhinus canicula	45		TRUE	FALSE
LOBSTER	93	PMF	2101	3174	Scyliorhinus canicula	40		TRUE	FALSE
LOBSTER	93	PMF	2101	3175	Scyliorhinus canicula	35		TRUE	FALSE
LOBSTER	94	PMF	2103	3176	Leucoraja naevus		40	TRUE	TRUE
LOBSTER	94	PMF	2105	3177	Raja clavata		50	FALSE	FALSE
LOBSTER	94	PMF	2105	3178	Raja sp.			TRUE	FALSE
LOBSTER	94	PMF	2106	3179	Scorpaena scrofa		35	TRUE	FALSE
LOBSTER	94	PMF	2106	3180	Raja miraletus		35	TRUE	FALSE
LOBSTER	94	PMF	2106	3181	Scorpaena scrofa		40	TRUE	FALSE
LOBSTER	94	PMF	2106	3182	Scorpaena scrofa		40	FALSE	FALSE
LOBSTER	94	PMF	2107	3183	Scorpaena scrofa		40	TRUE	FALSE
LOBSTER	94	PMF	2108	3184	Scorpaena scrofa		40	TRUE	FALSE
LOBSTER	94	PMF	2108	3185	Scorpaena scrofa		40	TRUE	FALSE
LOBSTER	94	PMF	2110	3186	Leucoraja naevus		40	TRUE	TRUE
LOBSTER	94	PMF	2110	3187	Raja clavata		65	TRUE	FALSE
LOBSTER	94	PMF	2111	3188	Raja clavata		45	TRUE	FALSE
LOBSTER	94	PMF	2111	3189	Leucoraja naevus		45	TRUE	TRUE
LOBSTER	94	PMF	2112	3190	Leucoraja naevus		40	TRUE	TRUE
LOBSTER	94	PMF	2113	3191	Raja clavata		50	TRUE	FALSE
LOBSTER	94	PMF	2115	3192	Leucoraja naevus		45	TRUE	TRUE
LOBSTER	94	PMF	2116	3193	Leucoraja naevus		45	TRUE	TRUE
LOBSTER	94	PMF	2117	3194	Leucoraja naevus		40	TRUE	TRUE
LOBSTER	94	PMF	2117	3195	Calappa granulata		10	TRUE	FALSE
LOBSTER	94	PMF	2118	3196	Leucoraja naevus		40	TRUE	TRUE
LOBSTER	94	PMF	2119	3197	Leucoraja naevus		40	TRUE	TRUE
LOBSTER	94	PMF	2119	3198	Leucoraja naevus		35	TRUE	TRUE
LOBSTER	94	PMF	2120	3199	Scorpaena scrofa		40	TRUE	FALSE
LOBSTER	94	PMF	2120	3200	Palinurus elephas		15	FALSE	FALSE
LOBSTER	94	PMF	2120	3201	Palinurus elephas		15	FALSE	FALSE
LOBSTER	94	PMF	2122	3202	Raja clavata		40	TRUE	FALSE
LOBSTER	94	PMF	2123	3203	Scorpaena scrofa		35	TRUE	FALSE
LOBSTER	94	PMF	2123	3204	Raja clavata		50	TRUE	FALSE
LOBSTER	94	PMF	2123	3205	Raja miraletus		30	TRUE	TRUE
LOBSTER	94	PMF	2125	3206	Lophius piscatorius		35	FALSE	FALSE
LOBSTER	95	PMF	2127	3208	Scorpaena scrofa		40	TRUE	FALSE
LOBSTER	95	PMF	2127	3209	Palinurus elephas		15	FALSE	FALSE
LOBSTER	95	PMF	2128	3210	Scorpaena porcus		25	TRUE	FALSE
LOBSTER	95	PMF	2128	3211	Lophius piscatorius			TRUE	FALSE
LOBSTER	95	PMF	2128	3212	Scorpaena scrofa		40	TRUE	FALSE
LOBSTER	95	PMF	2129	3213	Leucoraja naevus		30	TRUE	TRUE
LOBSTER	95	PMF	2129	3214	Raja clavata		65	TRUE	FALSE
LOBSTER	95	PMF	2130	3215	Palinurus elephas		15	FALSE	FALSE
LOBSTER	95	PMF	2132	3216	Leucoraja naevus		40	TRUE	TRUE
LOBSTER	95	PMF	2133	3217	Raja sp.			TRUE	FALSE
LOBSTER	95	PMF	2133	3218	Calappa granulata		10	TRUE	FALSE
LOBSTER	95	PMF	2134	3219	Leucoraja naevus		40	TRUE	TRUE
LOBSTER	95	PMF	2134	3220	Palinurus elephas		15	FALSE	FALSE
LOBSTER	95	PMF	2134	3221	Raja clavata		45	TRUE	FALSE
LOBSTER	95	PMF	2135	3222	Palinurus elephas		25	FALSE	FALSE
LOBSTER	95	PMF	2135	3223	Scorpaena scrofa		50	FALSE	FALSE
LOBSTER	95	PMF	2135	3224	Phycis sp.		25	TRUE	FALSE
LOBSTER	95	PMF	2136	3225	Scorpaena scrofa		40	TRUE	FALSE
LOBSTER	95	PMF	2136	3226	Scorpaena scrofa		40	FALSE	FALSE
LOBSTER	95	PMF	2137	3227	Leucoraja naevus		35	TRUE	TRUE
LOBSTER	95	PMF	2138	3228	Leucoraja naevus		35	TRUE	TRUE
LOBSTER	95	PMF	2139	3229	Leucoraja naevus		35	TRUE	TRUE
LOBSTER	95	PMF	2139	3230	Leucoraja naevus		35	TRUE	TRUE
LOBSTER	95	PMF	2141	3231	Leucoraja naevus		40	TRUE	TRUE
LOBSTER	95	PMF	2142	3232	Calappa granulata		10	TRUE	FALSE
LOBSTER	95	PMF	2144	3233	Raja sp.			TRUE	FALSE
LOBSTER	95	PMF	2145	3234	Leucoraja naevus		40	TRUE	TRUE
LOBSTER	95	PMF	2145	3235	Raja clavata		50	TRUE	FALSE
LOBSTER	95	PMF	2145	3236	Palinurus elephas		15	FALSE	FALSE
LOBSTER	95	PMF	2146	3237	Leucoraja naevus		40	TRUE	TRUE
LOBSTER	95	PMF	2149	3238	Raja clavata		60	TRUE	FALSE
LOBSTER	95	PMF	2152	3239	Leucoraja naevus		35	TRUE	TRUE
LOBSTER	95	PMF	2152	3240	Palinurus elephas		15	FALSE	FALSE
LOBSTER	95	PMF	2153	3241	Scorpaena scrofa		40	TRUE	FALSE
LOBSTER	95	PMF	2126	3207	Leucoraja naevus		45	TRUE	TRUE
LOBSTER	96	MMF	2158	3242	Palinurus elephas		15	FALSE	FALSE
LOBSTER	96	MMF	2159	3243	Leucoraja naevus		35	TRUE	FALSE
LOBSTER	96	MMF	2161	3244	Palinurus elephas		15	FALSE	FALSE
LOBSTER	96	MMF	2161	3245	Calappa granulata		10	TRUE	TRUE
LOBSTER	96	MMF	2161	3246	Raja clavata		45	TRUE	FALSE
LOBSTER	96	MMF	2161	3247	Palinurus elephas		15	FALSE	FALSE
LOBSTER	96	MMF	2164	3248	Palinurus elephas		15	FALSE	FALSE
LOBSTER	96	MMF	2164	3249	Trachinus draco		35	FALSE	FALSE
LOBSTER	96	MMF	2164	3250	Palinurus elephas		15	FALSE	FALSE
LOBSTER	96	MMF	2164	3251	Charonia lampas	40		TRUE	TRUE
LOBSTER	96	MMF	2165	3252	Palinurus elephas		15	FALSE	FALSE
LOBSTER	96	MMF	2165	3253	Palinurus elephas		15	FALSE	FALSE
LOBSTER	96	MMF	2166	3254	Palinurus elephas		15	FALSE	FALSE
LOBSTER	96	MMF	2166	3255	Calappa granulata		10	TRUE	TRUE
LOBSTER	96	MMF	2167	3256	Lophius piscatorius		35	TRUE	FALSE
LOBSTER	96	MMF	2168	3257	Peristedion cataphractum		25	FALSE	FALSE
LOBSTER	96	MMF	2169	3258	Palinurus elephas		15	FALSE	FALSE
LOBSTER	96	MMF	2169	3259	Palinurus elephas		15	FALSE	FALSE
LOBSTER	96	MMF	2169	3260	Palinurus elephas		15	FALSE	FALSE
LOBSTER	96	MMF	2169	3261	Palinurus elephas		15	FALSE	FALSE
LOBSTER	96	MMF	2171	3262	Leucoraja naevus		40	TRUE	TRUE
LOBSTER	96	MMF	2171	3263	Palinurus elephas		15	FALSE	FALSE
LOBSTER	96	MMF	2171	3264	Lophius piscatorius		40	FALSE	FALSE
LOBSTER	96	MMF	2174	3265	Calappa granulata		10	TRUE	FALSE
LOBSTER	96	MMF	2176	3266	Lophius piscatorius		35	TRUE	FALSE
LOBSTER	96	MMF	2177	3267	Palinurus elephas		15	FALSE	FALSE
LOBSTER	96	MMF	2177	3268	Palinurus elephas		15	FALSE	FALSE
LOBSTER	96	MMF	2177	3269	Palinurus elephas		15	FALSE	FALSE
LOBSTER	96	MMF	2177	3270	Palinurus elephas		15	FALSE	FALSE
LOBSTER	96	MMF	2178	3271	Trachinus draco		20	TRUE	FALSE
LOBSTER	97	PMF	2183	3272	Scorpaena scrofa		45	FALSE	FALSE
LOBSTER	97	PMF	2184	3273	Palinurus elephas		15	TRUE	FALSE
LOBSTER	97	PMF	2185	3274	Palinurus elephas		15	FALSE	FALSE
LOBSTER	97	PMF	2185	3275	Palinurus elephas		15	FALSE	FALSE
LOBSTER	97	PMF	2185	3276	Palinurus elephas		15	FALSE	FALSE
LOBSTER	97	PMF	2187	3277	Palinurus elephas		15	FALSE	FALSE
LOBSTER	97	PMF	2189	3278	Raja clavata		50	TRUE	FALSE
LOBSTER	97	PMF	2194	3279	Calappa granulata		10	TRUE	TRUE
LOBSTER	97	PMF	2194	3280	Palinurus elephas		15	FALSE	FALSE
LOBSTER	97	PMF	2195	3281	Palinurus elephas		15	FALSE	FALSE
LOBSTER	97	PMF	2195	3282	Palinurus elephas		15	TRUE	FALSE
LOBSTER	97	PMF	2195	3283	Palinurus elephas		15	FALSE	FALSE
LOBSTER	97	PMF	2196	3284	Palinurus elephas		15	FALSE	FALSE
LOBSTER	97	PMF	2197	3285	Palinurus elephas		15	FALSE	FALSE
LOBSTER	97	PMF	2197	3286	Palinurus elephas		15	FALSE	FALSE
LOBSTER	97	PMF	2198	3287	Raja clavata		50	TRUE	FALSE
LOBSTER	97	PMF	2199	3288	Palinurus elephas		15	FALSE	FALSE
LOBSTER	97	PMF	2199	3289	Scorpaena scrofa		35	FALSE	FALSE
[truncated: 172 more rows]
